# Supplementary material
Source: HighWire-hosted journal article supplement (doi:10.1101/rna.080290.124)
Supplement: Supplemental_Legends.docx [file Supplemental_Legends.docx]

**Supplemental File S1. RNA-Sequencing read mapping data.** The spreadsheet contains the numbers of total, mapped, unique mapped and unique mapped 19-23nt reads in the sample set as indicated.

**Supplemental File S2. dsRNA and RNA profiling data.** The spreadsheet contains the gene annotation data, tiling array expression data and dsRNA profiling data for s/a loci associated with significant dsRNA signals.

**Supplemental Figure S1. Total RNA quality control, small RNA isolation and quality control.** (A) The output of a total RNA analysis using the BioAnalyzer system is shown. Replicate mitotic and meiotic samples from Wildtype (WT) and Dicer/Argonaute (DA) strains cultured in rich medium with glucose (YPD) corresponding to mitosis and SPII sporulation medium for eight hours (8h) corresponding to meiosis are shown. The global sample annotation used is given to the right. Nucleotide numbers (x-axis, nt) are plotted against fluorescence units (y-axis, FU). (B) Images show the small RNA isolation procedure, whereby RNA samples are separated on polyacrylamide gels and gel fragments that contain small RNA fractions are cut out. Gels containing mitotic samples from WT and DA strains are shown before and after gel excision to illustrate the procedure. (C) The output of a BioAnalyzer analysis of enriched small RNA fractions is shown for samples as indicated at the top like in panel B. The global sample annotation is given to the right.

**Supplemental Figure S2. Background small RNA signal at an extremely highly expressed locus.** A filled line diagram plots genome annotation data (x-axis) for a selected s/a locus including two lncRNAs against linear expression data (read/nt, y-axis) like in Figure 2. Strains are indicated to the left. The s/a locus name and genome coordinates are given at the top.

**Supplemental Figure S3. Comparing dsRNA and RNA profiling data in strains with distinct sporulation kinetics and efficiencies.** (A) A color-coded bar diagram of RNA-Sequencing data for *YDR061W*/SUT470 from (Brar et al. 2012) created with IGV 2.8.0 is shown for samples undergoing mitosis or successive steps of meiosis and spore formation as indicated to the left. We note that the genome definition file we employed lacked ncRNA annotation data, which is why the SUT is not displayed. Linear data are shown as a filled line diagram for DA samples for a ubiquitously formed dsRNA in the middle panels. Tiling array data from Lardenois *et al*. 2011 for mitotic and meiotic samples as indicated to the left are shown as a color-coded heatmap (blue is low and red is high expression) in the panel to the right. Comparable dsRNA/RNA samples are highlighted in yellow (mitosis) and light blue (meiosis). (B) An example for a s/a locus lacking dsRNA signals (*PCH2*/SUT449) is shown in the context of expression data as in panel A.
