# Supplementary material
Source: HighWire-hosted journal article supplement (doi:10.1101/rna.080290.124)
Supplement: SupplementalMaterial_S1.xlsx [file SupplementalMaterial_S1.xlsx]

## Sheet: RNA-Sequencing data analysis
Sample	WT-MITOSIS-1	WT-MITOSIS-2	WT-MEIOSIS-1	WT-MEIOSIS-2	DA-MITOSIS-1	DA-MITOSIS-2	DA-MEIOSIS-1	DA-MEIOSIS-2	S
Total reads	12998316	44868696	76193402	40245331	45940138	45027620	40395737	44708981	350378221
Total mapped reads	12337674	41465198	73245069	38982794	40065067	40486913	35705689	39874530	322162934
Uniquely mapped reads	1325995	4233313	3989398	2316461	9315431	9662566	8465706	9542739	48851609
Uniquely mapped reads 19-23nt	87951	267463	363166	183130	5770682	6309193	6305598	7168607	26455790
