# Supplementary material
Source: HighWire-hosted journal article supplement (doi:10.1101/rna.080290.124)
Supplement: SupplementalMaterial_S2.xlsx [file SupplementalMaterial_S2.xlsx]

## Sheet: Legend
COLUMNS A-C:	column A shows the combinations of RNA biotypes encoded by the s/a locus; column B shows the gene name; column C indicates if one or both RNAs show significant differential signals
COLUMNS D-J:	genome annotation data
COLUMNS K-V:	tiling array expression data for samples from rich (YPD), pre-sporulation (YPA) and sporulation (SPII) media at the indicated time points are shown
COLUMNS WW-AB:	dsRNA signals from wild type (WT) and Dicer/Argonaut (DA) cells undergoing mitosis (MIT) or early meiosis (eMEI) are given with a color code as described at the bottom; AA indicates a significant dsRNA and AB the signal ratio between mitosis and meiosis

## Sheet: dsRNAs
SENSE/ANTISENSE LOCUS			RNA ASSOCIATED WITH A SIGNIFICANT dsRNA PROFILE							RNA EXPRESSION DATA (Lardenois, Liu et al., Proc Natl Acad Sci USA 2011)												dsRNA SIGNAL (read counts)
RNA biotypes	gene names	significance	biotype	chrom.	strand	start	stop	systematic name	gene name	YPD	YPA	SPII1h	SPII2h	SPII3h	SPII4h	SPII5h	SPII6h	SPII7h	SPII8h	SPII9h	SPII10h	WT_MIT	DA_MIT	WT_eMEI	DA_eMEI	significance	read ratio
mRNA/mRNA	YBL113C / YBL113W-A	ONE	mRNA	II	-	280	2658	YBL113C	YBL113C	11.7102	11.379	11.9954	12.0204	11.9596	12.0385	11.6511	11.5019	11.0665	11.2252	11.1924	11.0051	109.862	6061.52	111.838	2120.67	1	0.349858
mRNA/mRNA	PAR32 / YDL172C	ONE	mRNA	IV	+	148191	149078	YDL173W	PAR32	11.0592	11.2796	11.4233	11.1263	10.8292	10.9154	10.5608	10.4362	10.6567	10.8867	11.2029	10.9921	54.632	446.187	46.7362	1049.72	1	2.35265
mRNA/mRNA	YDL086W / YDL086C-A	ONE	mRNA	IV	+	301413	302234	YDL086W	YDL086W	10.9863	11.7724	11.9217	11.5933	11.3445	10.9863	10.9166	10.429	9.03582	8.45864	9.29455	8.90645	80.6586	355.025	63.9	695.967	1	1.96033
mRNA/mRNA	TRP1 / YDR008C	BOTH	mRNA	IV	+	461842	462516	YDR007W	TRP1	10.34	11.15	10.47	9.9	9.49	9.23	8.24	7.72	7.56	8.3	8.22	8.33	75.1197	32815.1	80.0555	20639.3	1	0.628957
mRNA/mRNA	YRF1-1 / YDR545C-A	ONE	mRNA	IV	+	1526321	1531711	YDR545W	YRF1-1	10.9278	10.5158	11.4782	11.5991	11.5621	11.4837	11.1319	10.9397	10.6703	10.5101	10.2247	10.1318	165.591	33668.9	178.077	15245	1	0.45279
mRNA/mRNA	YIL177C / YIL177W-A	ONE	mRNA	IX	-	483	4598	YIL177C	YIL177C	11.0768	10.6599	11.6164	11.6915	11.6547	11.6438	11.2801	11.0386	10.7982	10.6674	10.4133	10.2787	163.341	38228.6	257.804	14120.6	1	0.369373
mRNA/mRNA	YEL077C / YEL077W-A	ONE	mRNA	V	-	264	4097	YEL077C	YEL077C	11.5216	11.0726	11.8385	11.888	11.8525	11.8536	11.4976	11.3083	10.9461	10.975	10.7801	10.6327	120.924	15310.6	139.766	5677.65	1	0.370832
mRNA/mRNA	YEL076C / YEL075W-A	ONE	mRNA	V	-	4464	5114	YEL076C	YEL076C	9.98	9.36	10.95	11.16	11.09	11.01	10.59	10.4	10.23	9.86	9.45	9.26	5.1239	5022.44	19.2601	1842.59	1	0.366872
mRNA/mRNA	PRO3 / YER023C-A	ONE	mRNA	V	+	201076	201936	YER023W	PRO3	11.35	11.28	11.53	12.04	12.27	12.28	12.32	11.99	11.28	10.3	10.08	9.48	57.7687	210.174	123.272	1520.6	1	7.23494
mRNA/mRNA	YER152C / YER152W-A	BOTH	mRNA	V	-	472657	473988	YER152C	YER152C	9.33	10.05	10.65	10.58	10.6	10.78	10.36	9.81	8.62	8.16	8.67	8.11	53.4945	571.153	72.1967	1097.13	1	1.92091
mRNA/mRNA	YRF1-2 / YER190C-A	ONE	mRNA	V	+	571480	576525	YER190W	YRF1-2	10.9062	10.429	11.4316	11.5781	11.5387	11.4717	11.1206	10.9003	10.6624	10.47	10.1968	10.0635	131.345	28346.5	129.899	11572.2	1	0.408243
mRNA/mRNA	YRF1-2 / YER190C-B	ONE	mRNA	V	+	571480	576525	YER190W	YRF1-2	10.9062	10.429	11.4316	11.5781	11.5387	11.4717	11.1206	10.9003	10.6624	10.47	10.1968	10.0635	131.345	28346.5	129.899	11572.2	1	0.408243
mRNA/mRNA	HSF1 / YGL072C	BOTH	mRNA	VII	+	368753	371254	YGL073W	HSF1	9.06835	9.50729	9.81948	9.79681	10.0721	10.1106	10.4369	10.4849	9.43666	8.77625	8.69668	8.59588	140.197	450.557	106.438	843.626	1	1.87241
mRNA/mRNA	ART5 / YGR068W-A	ONE	mRNA	VII	-	625324	627084	YGR068C	ART5	8.68	8.18	8.56	7.41	7.38	6.67	6.86	7.36	5.13	5.87	5.72	5.82	42.4665	125.034	51.7152	1266.12	1	10.1262
mRNA/mRNA	YRF1-3 / YGR296C-A	BOTH	mRNA	VII	+	1085031	1090591	YGR296W	YRF1-3	10.8988	10.4435	11.4415	11.5744	11.5046	11.4491	11.1012	10.8882	10.6469	10.4325	10.2141	10.072	123.302	30841.2	131.78	14660.7	1	0.475362
mRNA/mRNA	YRF1-3 / YGR296C-B	BOTH	mRNA	VII	+	1085031	1090591	YGR296W	YRF1-3	10.8988	10.4435	11.4415	11.5744	11.5046	11.4491	11.1012	10.8882	10.6469	10.4325	10.2141	10.072	123.302	30841.2	131.78	14660.7	1	0.475362
mRNA/mRNA	YHL050C / YHL050W-A	ONE	mRNA	VIII	-	445	1897	YHL050C	YHL050C	11.4471	11.0687	11.6983	11.7538	11.7162	11.7929	11.4634	11.24	10.8485	10.9464	10.8224	10.5761	57.6168	3978.43	47.3933	1488.94	1	0.374255
mRNA/mRNA	STE20 / YHL006W-A	ONE	mRNA	VIII	-	95118	97937	YHL007C	STE20	10.325	8.99254	8.38892	7.45255	7.65575	6.70223	6.81424	7.05089	7.24608	8.07359	8.25217	7.87369	104.661	355.104	69.1025	531.334	1	1.49628
mRNA/mRNA	TRM5 / YHR070C-A	ONE	mRNA	VIII	+	234881	236380	YHR070W	TRM5	9.60939	8.73273	8.17311	7.28273	7.75706	7.00656	7.16075	7.03043	5.4324	6.36683	7.11571	6.47749	146.015	1326.44	75.1904	1190.95	1	0.897851
mRNA/mRNA	ARO9 / YHR137C-A	BOTH	mRNA	VIII	+	375709	377250	YHR137W	ARO9	5.59419	11.1082	10.5936	10.8405	10.9207	11.1781	11.7114	11.7619	10.9689	9.95078	10.9088	10.3563	27.3161	34.7873	137.443	3337.07	1	95.928
mRNA/mRNA	YHR219W / YHR219C-A	ONE	mRNA	VIII	+	560173	562047	YHR219W	YHR219W	11.3933	10.9705	11.7606	11.8277	11.8227	11.7775	11.4122	11.198	10.9084	10.8742	10.588	10.5146	39.3049	2607.66	26.7283	882.087	1	0.338267
mRNA/mRNA	YJL225C / YJL225W-A	ONE	mRNA	X	-	466	4581	YJL225C	YJL225C	11.0768	10.6599	11.6094	11.6845	11.6407	11.6368	11.2731	11.0386	10.7912	10.6674	10.4062	10.2787	143.486	38191.6	256.038	14310.8	1	0.374711
mRNA/mRNA	ICS3 / YJL077W-A	ONE	mRNA	X	-	294666	295061	YJL077C	ICS3	3.86068	4.6176	4.84003	4.3751	4.70606	4.78551	4.68298	4.01674	4.09402	4.30285	4.3979	4.41288	8.67555	102.843	30.234	421.887	1	4.10227
mRNA/mRNA	TES1 / YJR020W	ONE	mRNA	X	-	467232	468281	YJR019C	TES1	8.06366	11.4442	12.1303	11.3846	11.3846	11.1758	10.8079	10.2014	9.76389	9.70423	10.6488	9.75394	52.078	543.756	37.6545	708.798	1	1.30352
mRNA/mRNA	YLL067C / YLL067W-A	ONE	mRNA	XII	-	585	3915	YLL067C	YLL067C	11.228	10.7388	11.6146	11.6603	11.643	11.5907	11.2292	11.0783	10.7606	10.7039	10.4994	10.3329	76.4091	10687.2	91.3594	3996.71	1	0.37397
mRNA/mRNA	YLL066C / YLL066W-A	ONE	mRNA	XII	-	6120	9450	YLL066C	YLL066C	11.2726	10.7651	11.6539	11.6952	11.6834	11.6416	11.2738	11.1141	10.7962	10.7361	10.5296	10.3497	63.1309	10688.9	65.6662	3829.05	1	0.358227
mRNA/mRNA	MAS1 / YLR163W-A	ONE	mRNA	XII	-	491866	493254	YLR163C	MAS1	10.39	10.27	9.32	9.4	9.63	9.69	10	9.81	9.89	9.77	9.71	9.29	111.288	268.021	89.3787	847.185	1	3.1609
mRNA/mRNA	TOP3 / YLR235C	ONE	mRNA	XII	+	609783	611753	YLR234W	TOP3	7.67961	7.28197	8.80237	8.89664	9.24547	9.21221	9.32719	8.57108	7.1516	7.22372	6.97464	6.81965	235.554	4017.68	224.476	5207.5	1	1.29615
mRNA/mRNA	TAD3 / YLR317W	ONE	mRNA	XII	-	765266	766073	YLR316C	TAD3	8.54572	7.55212	7.89542	7.79795	7.75189	7.76675	7.69816	7.83183	7.30874	6.83886	6.86443	7.01746	20.5126	532.849	25.3646	410.512	1	0.770409
mRNA/mRNA	KAP95 / YLR347W-A	ONE	mRNA	XII	-	823828	826413	YLR347C	KAP95	11.54	10.84	10.72	10.75	11.24	11.26	11.44	10.87	10.1	9.68	9.99	9.35	144.446	427.815	143.083	1138.43	1	2.66103
mRNA/mRNA	YLR462W / YLR463C	BOTH	mRNA	XII	+	1065956	1066564	YLR462W	YLR462W	10.74	10.24	11.44	11.5	11.48	11.37	11.04	10.85	10.66	10.37	9.97	9.86	3.94569	2939.57	10.3001	1064.46	1	0.362114
mRNA/mRNA	YLR463C / YLR464W	ONE	mRNA	XII	-	1066265	1066816	YLR463C	YLR463C	9.15	8.35	8.69	8.03	8.02	8.34	8.3	9.06	8.82	8.12	9.27	8.95	6.62676	2672.8	8.63443	1244.09	1	0.465461
mRNA/mRNA	YRF1-4 / YLR466C-A	BOTH	mRNA	XII	+	1067087	1071235	YLR466W	YRF1-4	10.8707	10.4665	11.3961	11.4503	11.4391	11.3786	11.0326	10.8521	10.5805	10.4601	10.1696	10.0931	137.996	22696.3	120.189	8962.49	1	0.394887
mRNA/mRNA	YRF1-5 / YLR467C-A	BOTH	mRNA	XII	+	1072508	1077898	YLR467W	YRF1-5	10.9257	10.5133	11.4769	11.598	11.5608	11.4821	11.1303	10.9384	10.6691	10.5083	10.2227	10.1296	144.903	33229.7	143.85	15028.6	1	0.452265
mRNA/mRNA	YML133C / YML133W-B	ONE	mRNA	XIII	-	461	3791	YML133C	YML133C	11.3033	10.7929	11.682	11.7224	11.7128	11.6731	11.3093	11.1564	10.8251	10.7803	10.5539	10.3747	102.613	14371.5	98.0083	7551.84	1	0.525475
mRNA/mRNA	YML133C / YML133W-A	ONE	mRNA	XIII	-	461	3791	YML133C	YML133C	11.3033	10.7929	11.682	11.7224	11.7128	11.6731	11.3093	11.1564	10.8251	10.7803	10.5539	10.3747	102.613	14371.5	98.0083	7551.84	1	0.525475
mRNA/mRNA	CAC2 / YML101C-A	BOTH	mRNA	XIII	+	68294	69700	YML102W	CAC2	9.67	8.23	9.75	10.15	10.51	10.46	9.78	9.29	8.6	8.62	8.91	7.97	39.1282	1151.13	81.7346	1708.35	1	1.48405
mRNA/mRNA	MET2 / YNL276C	ONE	mRNA	XIV	+	117349	118809	YNL277W	MET2	7.23786	8.84167	9.50756	8.50225	8.79869	8.46305	8.80434	9.47632	10.1291	9.67139	9.13296	8.24127	244.707	1420.7	424.185	1932.19	1	1.36002
mRNA/mRNA	YOR378W / YOR379C	BOTH	mRNA	XV	+	1049511	1051058	YOR378W	YOR378W	4.04725	5.40394	4.07448	3.56767	3.89183	3.47897	3.41363	3.65963	4.47251	4.81667	5.16453	4.6509	236.13	3756.28	55.3796	19358.8	1	5.15372
mRNA/mRNA	YRF1-8 / YOR396C-A	ONE	mRNA	XV	+	1085473	1090863	YOR396W	YRF1-8	10.9168	10.5066	11.4702	11.5935	11.554	11.4754	11.1236	10.9317	10.6624	10.5038	10.216	10.1252	162.886	33164.1	169.548	15070.5	1	0.454422
mRNA/mRNA	YRF1-7 / YPL283W-B	BOTH	mRNA	XVI	-	280	5840	YPL283C	YRF1-7	10.8706	10.3883	11.3865	11.4872	11.4717	11.3871	11.0798	10.8442	10.6105	10.4636	10.1716	9.9905	133.09	30634	143.189	14546.4	1	0.474844
mRNA/mRNA	YRF1-7 / YPL283W-A	ONE	mRNA	XVI	-	280	5840	YPL283C	YRF1-7	10.8706	10.3883	11.3865	11.4872	11.4717	11.3871	11.0798	10.8442	10.6105	10.4636	10.1716	9.9905	133.09	30634	143.189	14546.4	1	0.474844
mRNA/mRNA	YPR204W / YPR204C-A	ONE	mRNA	XVI	+	944603	947701	YPR204W	YPR204W	11.2944	10.843	11.6955	11.7821	11.7564	11.7442	11.3596	11.1539	10.876	10.8008	10.5851	10.4933	90.9273	6590.06	71.9912	2399.48	1	0.364106
mRNA/MUT	SWR1 / MUT298.1	ONE	mRNA	IV	+	1135932	1140476	YDR334W	SWR1	8.94145	7.80938	8.07186	7.88781	8.18452	8.34086	8.5802	8.47943	8.14385	8.14881	7.82086	7.56588	159.219	3419.92	234.68	3559.11	1	1.0407
mRNA/MUT	PCM1 / MUT423.1	ONE	mRNA	V	+	43252	44925	YEL058W	PCM1	10.56	10.19	10.41	10.38	10.15	9.89	10.36	11.67	12.17	11.48	11.1	10.94	133.799	981.529	287.404	2178.68	1	2.21967
mRNA/MUT	YHR033W / MUT681.1	BOTH	mRNA	VIII	+	175548	176819	YHR033W	YHR033W	5.24335	11.4729	11.8927	11.7658	12.0783	12.3614	12.6055	12.6934	12.4102	12.1857	12.42	11.8927	17.0473	355.929	517.192	5778.36	1	16.2346
mRNA/MUT	DUS3 / MUT1074.1	ONE	mRNA	XII	-	922442	924448	YLR401C	DUS3	9.9389	8.43684	6.67874	6.21361	6.42272	5.79509	6.28994	7.51585	6.88707	6.64285	6.9366	7.41142	92.7994	868.657	45.9558	370.384	1	0.426387
mRNA/MUT	DUS3 / MUT1074.2	ONE	mRNA	XII	-	922442	924448	YLR401C	DUS3	9.9389	8.43684	6.67874	6.21361	6.42272	5.79509	6.28994	7.51585	6.88707	6.64285	6.9366	7.41142	92.7994	868.657	45.9558	370.384	1	0.426387
mRNA/MUT	VNX1 / MUT1180.1	ONE	mRNA	XIV	+	34696	37422	YNL321W	VNX1	9.2	9.76	10.64	10.87	11.27	11.36	11.48	11	9.66	8.65	9.37	8.73	198.195	1890.76	637.247	3072.11	1	1.6248
mRNA/MUT	VNX1 / MUT1180.2	ONE	mRNA	XIV	+	34696	37422	YNL321W	VNX1	9.2	9.76	10.64	10.87	11.27	11.36	11.48	11	9.66	8.65	9.37	8.73	198.195	1890.76	637.247	3072.11	1	1.6248
mRNA/MUT	CLA4 / MUT1182.2	ONE	mRNA	XIV	+	68915	71443	YNL298W	CLA4	9.09	7.9	9.49	9.99	10.15	9.46	9.28	8.82	7.37	6.14	5.72	5.69	79.2173	526.111	77.1893	1110.36	1	2.11051
mRNA/MUT	LYP1 / MUT1189.1	BOTH	mRNA	XIV	+	138550	140385	YNL268W	LYP1	10.04	10.29	10.14	9.49	8.99	8.31	9.12	10.6	11.55	11.36	10.99	10.88	179.781	470.086	284.086	14038.1	1	29.863
mRNA/MUT	TCB2 / MUT1206.1	BOTH	mRNA	XIV	+	462411	465947	YNL087W	TCB2	11.0709	9.02777	8.31364	8.50443	9.34667	8.999	8.71515	8.52643	8.56891	7.75081	7.03091	7.10884	105.244	2039.36	83.9434	2622.13	1	1.28576
mRNA/MUT	NUP1 / MUT1416.1	ONE	mRNA	XV	-	507948	511178	YOR098C	NUP1	10.0689	9.19371	9.15511	8.45768	8.84206	8.67355	9.22042	9.42496	9.08472	8.66937	8.72241	8.44492	151.504	1008.65	126.253	3348.76	1	3.32003
mRNA/SUT	GDH3 / SUT434	BOTH	mRNA	I	+	31567	32940	YAL062W	GDH3	6.14	10.84	13.23	12.83	12.84	12.26	11.66	10.96	10.19	10.19	11.74	11.15	6.62676	116.223	45.5132	1139.13	1	9.80124
mRNA/SUT	CYC3 / SUT003	ONE	mRNA	I	-	68716	69525	YAL039C	CYC3	10.86	11.04	11.34	10.55	10.28	10.21	10.27	10.35	10.05	10.43	10.45	9.96	80.9624	2557.12	94.0202	3916.3	1	1.53152
mRNA/SUT	YAT1 / SUT436	ONE	mRNA	I	+	190193	192256	YAR035W	YAT1	6.29	12.89	13.96	13.63	13.02	13.38	12.93	12.27	11.44	10.87	11.26	11.15	51.6224	770.841	4238.69	7570.53	1	9.82113
mRNA/SUT	YAR068W / SUT863.1	BOTH	mRNA	I	+	222406	222891	YAR068W	YAR068W	11.1186	11.07	11.4164	11.2614	11.1909	11.1804	11.1283	11.0378	11.0157	10.5795	9.96156	10.211	25.5709	6873.93	78.1752	6226.56	1	0.905822
mRNA/SUT	YBL100W-A / SUT887.1	ONE	mRNA	II	+	29935	31251	YBL100W-A	YBL100W-A	10.2	11.03	11.21	11.34	11.21	10.9	10.61	10.89	10.42	9.17	8.37	9.04	0	508.07	0	307.072	1	0.604389
mRNA/SUT	YBL100W-A / SUT887.2	ONE	mRNA	II	+	29935	31251	YBL100W-A	YBL100W-A	10.2	11.03	11.21	11.34	11.21	10.9	10.61	10.89	10.42	9.17	8.37	9.04	0	508.07	0	307.072	1	0.604389
mRNA/SUT	TIP1 / SUT016	ONE	mRNA	II	-	372103	372735	YBR067C	TIP1	8.05	13.2	12.77	12.1	12.21	11.69	11.44	11.19	10.26	11.7	13.02	12.16	38.1923	626.371	310.971	4554.56	1	7.27134
mRNA/SUT	IST2 / SUT984.1	ONE	mRNA	II	-	420201	423041	YBR086C	IST2	10.7929	10.57	9.97132	9.63735	9.62146	8.77497	8.49952	7.90753	6.99166	7.74824	9.72499	8.96908	202.343	272.389	236.004	1729.91	1	6.35091
mRNA/SUT	IST2 / SUT984.2	ONE	mRNA	II	-	420201	423041	YBR086C	IST2	10.7929	10.57	9.97132	9.63735	9.62146	8.77497	8.49952	7.90753	6.99166	7.74824	9.72499	8.96908	202.343	272.389	236.004	1729.91	1	6.35091
mRNA/SUT	PHO3 / SUT986.1	ONE	mRNA	II	-	427698	429101	YBR092C	PHO3	11.0472	7.83332	8.37623	6.93448	7.4427	6.74338	7.78662	9.26256	7.35851	7.33019	8.0017	7.48379	235.123	2486.34	20.3767	515.226	1	0.207223
mRNA/SUT	TKL2 / SUT018	ONE	mRNA	II	-	474392	476437	YBR117C	TKL2	3.61	10.3	11.43	11.8	10.29	9.36	8.92	8.29	8.99	10.57	11.78	11.01	54.3909	761.054	133.51	2049.09	1	2.69244
mRNA/SUT	HSL7 / SUT988.1	ONE	mRNA	II	-	501804	504287	YBR133C	HSL7	9.59268	7.99546	8.34482	7.69912	8.5847	7.97399	8.64658	9.55116	9.88207	9.03499	8.07752	8.55314	68.0126	659.101	97.6756	5437.66	1	8.25012
mRNA/SUT	HSL7 / SUT988.2	ONE	mRNA	II	-	501804	504287	YBR133C	HSL7	9.59268	7.99546	8.34482	7.69912	8.5847	7.97399	8.64658	9.55116	9.88207	9.03499	8.07752	8.55314	68.0126	659.101	97.6756	5437.66	1	8.25012
mRNA/SUT	YBR241C / SUT1007.1	ONE	mRNA	II	-	702589	704055	YBR241C	YBR241C	7.89	10.73	11.69	12	11.81	11.57	11.14	10.77	9.5	10.25	11.91	11.32	80.5067	438.454	358.176	1757.64	1	4.00874
mRNA/SUT	YBR241C / SUT1007.2	ONE	mRNA	II	-	702589	704055	YBR241C	YBR241C	7.89	10.73	11.69	12	11.81	11.57	11.14	10.77	9.5	10.25	11.91	11.32	80.5067	438.454	358.176	1757.64	1	4.00874
mRNA/SUT	YCL020W / SUT1028.1	ONE	mRNA	III	+	85102	86418	YCL020W	YCL020W	10.05	11.1	11.22	11.31	11.22	10.98	10.61	10.92	10.41	9.01	8.32	9.02	0	649.613	0	339.148	1	0.522077
mRNA/SUT	SGF29 / SUT1060.1	ONE	mRNA	III	-	103571	104350	YCL010C	SGF29	11.16	10.12	10.28	9.99	10.02	9.78	10.35	11.61	12	11.37	11.08	11.17	26.6837	4453.23	83.939	2435.86	1	0.546989
mRNA/SUT	SYP1 / SUT033	ONE	mRNA	III	-	173826	176438	YCR030C	SYP1	9.25936	10.5096	10.4749	10.5634	10.4234	10.1823	10.1689	9.59691	8.75037	8.15281	8.66155	8.72557	258.19	1953.85	311.637	998.515	1	0.51105
mRNA/SUT	YIH1 / SUT037	ONE	mRNA	III	-	223454	224230	YCR059C	YIH1	10.45	10.09	10.41	9.85	9.87	9.92	9.77	8.83	7.75	7.3	8.44	7.98	45.2994	1072.14	49.3877	531.74	1	0.495959
mRNA/SUT	PTC6 / SUT1041.1	ONE	mRNA	III	+	252845	254173	YCR079W	PTC6	9.41	10.77	11.58	11.46	11.48	11.32	11.26	10.71	10.29	10.28	10.57	10.06	31.894	1020.28	94.1431	931.494	1	0.912976
mRNA/SUT	PTC6 / SUT1041.2	BOTH	mRNA	III	+	252845	254173	YCR079W	PTC6	9.41	10.77	11.58	11.46	11.48	11.32	11.26	10.71	10.29	10.28	10.57	10.06	31.894	1020.28	94.1431	931.494	1	0.912976
mRNA/SUT	BRE4 / SUT1209.1	BOTH	mRNA	IV	-	38867	42244	YDL231C	BRE4	10.3006	9.49319	10.0369	10.012	10.3687	9.75427	9.41769	9.75955	9.96204	9.22853	9.06565	9.01114	139.667	632.563	167.248	3040.99	1	4.80741
mRNA/SUT	BRE4 / SUT1209.2	BOTH	mRNA	IV	-	38867	42244	YDL231C	BRE4	10.3006	9.49319	10.0369	10.012	10.3687	9.75427	9.41769	9.75955	9.96204	9.22853	9.06565	9.01114	139.667	632.563	167.248	3040.99	1	4.80741
mRNA/SUT	BRE4 / SUT1209.3	ONE	mRNA	IV	-	38867	42244	YDL231C	BRE4	10.3006	9.49319	10.0369	10.012	10.3687	9.75427	9.41769	9.75955	9.96204	9.22853	9.06565	9.01114	139.667	632.563	167.248	3040.99	1	4.80741
mRNA/SUT	BRE4 / SUT1209.4	ONE	mRNA	IV	-	38867	42244	YDL231C	BRE4	10.3006	9.49319	10.0369	10.012	10.3687	9.75427	9.41769	9.75955	9.96204	9.22853	9.06565	9.01114	139.667	632.563	167.248	3040.99	1	4.80741
mRNA/SUT	BRE4 / SUT1213.1	BOTH	mRNA	IV	-	38867	42244	YDL231C	BRE4	10.3006	9.49319	10.0369	10.012	10.3687	9.75427	9.41769	9.75955	9.96204	9.22853	9.06565	9.01114	139.667	632.563	167.248	3040.99	1	4.80741
mRNA/SUT	HBT1 / SUT041	ONE	mRNA	IV	-	57265	60405	YDL223C	HBT1	6.92	12.57	12.54	12.51	12	11.85	11.92	11.94	11.37	11.77	12.72	12.29	141.868	1956.07	457.157	1833.15	1	0.93716
mRNA/SUT	CDC13 / SUT1217.1	ONE	mRNA	IV	-	62244	65018	YDL220C	CDC13	7.27653	7.21181	7.55271	7.71076	7.92957	7.67823	7.55739	7.05305	5.79063	5.82255	7.07695	6.34564	135.089	661.566	161.475	2659.53	1	4.02006
mRNA/SUT	CDC13 / SUT1217.2	ONE	mRNA	IV	-	62244	65018	YDL220C	CDC13	7.27653	7.21181	7.55271	7.71076	7.92957	7.67823	7.55739	7.05305	5.79063	5.82255	7.07695	6.34564	135.089	661.566	161.475	2659.53	1	4.02006
mRNA/SUT	VCX1 / SUT461	ONE	mRNA	IV	+	232652	233887	YDL128W	VCX1	10.55	11.25	11.51	10.97	10.39	9.61	9.08	8.49	8.98	9.89	10.83	9.89	39.0012	2012.45	58.3599	842.208	1	0.418498
mRNA/SUT	YDR098C-A / SUT1264.1	ONE	mRNA	IV	-	649804	651126	YDR098C-A	YDR098C-A	10.9116	11.3163	11.4463	11.8385	11.8445	11.7387	11.3743	11.5668	11.205	10.3204	9.86094	10.475	3.80876	4235.98	11.9213	3034.38	1	0.716334
mRNA/SUT	YDR210W-A / SUT1152.1	ONE	mRNA	IV	+	872112	873428	YDR210W-A	YDR210W-A	10.18	10.98	11.18	11.32	11.16	10.87	10.54	10.84	10.42	9.13	8.46	8.97	0	628.639	0	338.411	1	0.538323
mRNA/SUT	CTA1 / SUT063	ONE	mRNA	IV	-	968133	969680	YDR256C	CTA1	7.34202	11.7865	13.1517	12.1317	12.575	12.6383	12.4758	12.0681	11.4302	11.4551	12.2782	11.7399	18.4638	1101.19	286.738	1136.03	1	1.03163
mRNA/SUT	YDR261C-C / SUT1288.1	ONE	mRNA	IV	-	991027	992349	YDR261C-C	YDR261C-C	10.168	11.1515	11.324	11.7009	11.6922	11.636	11.2334	11.4768	11.1248	10.2434	9.78662	10.3643	2.71914	4219.31	17.658	3079.55	1	0.72987
mRNA/SUT	YDR316W-A / SUT1168.1	ONE	mRNA	IV	+	1096064	1097386	YDR316W-A	YDR316W-A	10.3054	11.221	11.4067	11.8364	11.8392	11.7272	11.3684	11.5738	11.242	10.366	9.87646	10.472	25.1571	4350.76	10.8858	3031.2	1	0.696705
mRNA/SUT	JIP4 / SUT075	ONE	mRNA	IV	-	1407464	1410094	YDR475C	JIP4	8.92024	9.30511	9.3598	9.31094	9.26207	8.67282	8.75908	8.79666	8.15324	7.3419	7.43827	7.43605	284.848	3083.38	105.657	1807.25	1	0.586127
mRNA/SUT	PHO8 / SUT1310.1	ONE	mRNA	IV	-	1418550	1420250	YDR481C	PHO8	10.27	11.4	12.47	12.15	12.4	12.28	12.07	12.03	11.3	10.44	10.12	10.1	155.019	1027.06	279.637	715.309	1	0.696466
mRNA/SUT	PHO8 / SUT1311.1	ONE	mRNA	IV	-	1418550	1420250	YDR481C	PHO8	10.27	11.4	12.47	12.15	12.4	12.28	12.07	12.03	11.3	10.44	10.12	10.1	155.019	1027.06	279.637	715.309	1	0.696466
mRNA/SUT	PHO8 / SUT1311.2	ONE	mRNA	IV	-	1418550	1420250	YDR481C	PHO8	10.27	11.4	12.47	12.15	12.4	12.28	12.07	12.03	11.3	10.44	10.12	10.1	155.019	1027.06	279.637	715.309	1	0.696466
mRNA/SUT	QDR2 / SUT606	BOTH	mRNA	IX	+	132244	133872	YIL121W	QDR2	4.80883	11.8805	8.51527	9.00303	8.93584	8.64397	8.73535	8.3716	8.89601	8.43839	7.54118	7.49268	24.4582	179.5	44.0802	4055.77	1	22.5949
mRNA/SUT	XBP1 / SUT1755.1	ONE	mRNA	IX	-	175307	177250	YIL101C	XBP1	5.12	9.8	10.13	10.33	10.12	10.14	9.97	9.38	9.95	11.08	11.74	11.08	74.1837	763.126	175.202	3200.91	1	4.19447
mRNA/SUT	XBP1 / SUT1755.2	ONE	mRNA	IX	-	175307	177250	YIL101C	XBP1	5.12	9.8	10.13	10.33	10.12	10.14	9.97	9.38	9.95	11.08	11.74	11.08	74.1837	763.126	175.202	3200.91	1	4.19447
mRNA/SUT	XBP1 / SUT1755.3	ONE	mRNA	IX	-	175307	177250	YIL101C	XBP1	5.12	9.8	10.13	10.33	10.12	10.14	9.97	9.38	9.95	11.08	11.74	11.08	74.1837	763.126	175.202	3200.91	1	4.19447
mRNA/SUT	PDR11 / SUT189	BOTH	mRNA	IX	-	328207	332442	YIL013C	PDR11	9.09694	8.42132	9.24603	9.14229	9.9258	9.58355	10.1359	9.82846	8.60689	7.27195	6.59997	6.37168	233.275	17942.2	1250.19	15902	1	0.88629
mRNA/SUT	DCG1 / SUT196	ONE	mRNA	IX	-	412036	412770	YIR030C	DCG1	4.21	4.41	7.13	7.71	8.33	6.58	5.47	3.88	3.31	4.05	3.93	4.55	13.2535	19.6353	17.0543	857.492	1	43.671
mRNA/SUT	YEL077C / SUT1369.1	ONE	mRNA	V	-	264	4097	YEL077C	YEL077C	11.5216	11.0726	11.8385	11.888	11.8525	11.8536	11.4976	11.3083	10.9461	10.975	10.7801	10.6327	120.924	15310.6	139.766	5677.65	1	0.370832
mRNA/SUT	YEL077C / SUT1369.2	BOTH	mRNA	V	-	264	4097	YEL077C	YEL077C	11.5216	11.0726	11.8385	11.888	11.8525	11.8536	11.4976	11.3083	10.9461	10.975	10.7801	10.6327	120.924	15310.6	139.766	5677.65	1	0.370832
mRNA/SUT	YEL077C / SUT1369.3	ONE	mRNA	V	-	264	4097	YEL077C	YEL077C	11.5216	11.0726	11.8385	11.888	11.8525	11.8536	11.4976	11.3083	10.9461	10.975	10.7801	10.6327	120.924	15310.6	139.766	5677.65	1	0.370832
mRNA/SUT	SPC25 / SUT090	ONE	mRNA	V	-	191959	192624	YER018C	SPC25	8.58	9.07	10.39	10.45	10.85	10.91	11.09	11.85	12.24	11.83	11.19	11.06	47.6767	881.399	214.846	1593.37	1	1.80777
mRNA/SUT	HIS1 / SUT1389.1	ONE	mRNA	V	-	264892	265785	YER055C	HIS1	11.9861	10.7716	10.4032	9.14888	9.26834	9.04933	8.95973	9.91544	10.4729	9.48736	9.48736	8.67103	223.614	1319.87	85.057	882.562	1	0.668676
mRNA/SUT	FCY2 / SUT1390.3	ONE	mRNA	V	-	266512	268113	YER056C	FCY2	11.5	10.96	11.49	11.26	11.37	10.91	10.73	10.71	10.31	10.43	10.68	10.31	186.054	6124.1	184.726	2061.59	1	0.336635
mRNA/SUT	FCY2 / SUT1390.4	ONE	mRNA	V	-	266512	268113	YER056C	FCY2	11.5	10.96	11.49	11.26	11.37	10.91	10.73	10.71	10.31	10.43	10.68	10.31	186.054	6124.1	184.726	2061.59	1	0.336635
mRNA/SUT	FCY2 / SUT1390.5	ONE	mRNA	V	-	266512	268113	YER056C	FCY2	11.5	10.96	11.49	11.26	11.37	10.91	10.73	10.71	10.31	10.43	10.68	10.31	186.054	6124.1	184.726	2061.59	1	0.336635
mRNA/SUT	HOR2 / SUT1395.2	ONE	mRNA	V	-	279930	280682	YER062C	HOR2	10.88	11.22	11.4	10.8	11.57	11.68	12.01	11.91	11.26	10.93	10.73	10.12	70.2381	1110.82	141.87	1184.95	1	1.06674
mRNA/SUT	HOR2 / SUT1395.3	ONE	mRNA	V	-	279930	280682	YER062C	HOR2	10.88	11.22	11.4	10.8	11.57	11.68	12.01	11.91	11.26	10.93	10.73	10.12	70.2381	1110.82	141.87	1184.95	1	1.06674
mRNA/SUT	ICL1 / SUT093	ONE	mRNA	V	-	285241	286914	YER065C	ICL1	7.88	13.99	13.72	13.14	13.11	13.23	13.35	13.33	13.63	13.48	13.71	13.41	81.4428	12845	1424.91	6175.29	1	0.480754
mRNA/SUT	PTP3 / SUT094	ONE	mRNA	V	-	308413	311199	YER075C	PTP3	6.69335	5.77938	7.1652	6.72994	6.3415	5.01309	6.54918	8.61231	8.78643	7.89996	7.07698	7.51299	30.6294	1166.82	94.1478	355.256	1	0.304465
mRNA/SUT	PTC2 / SUT1408.1	ONE	mRNA	V	-	335946	337340	YER089C	PTC2	9.78968	9.56129	9.78836	9.36651	9.23461	8.78151	8.95997	9.34024	9.21935	9.15386	8.72542	8.77758	205.981	3935.58	135.708	3183.22	1	0.808831
mRNA/SUT	ECM32 / SUT1363.1	ONE	mRNA	V	+	541690	545055	YER176W	ECM32	9.00725	7.99575	8.24649	7.72431	7.82359	7.68479	8.25241	9.25272	9.38368	8.83239	7.95525	8.28362	29.3648	1977.56	51.5005	4860.21	1	2.45768
mRNA/SUT	ECM32 / SUT1363.2	ONE	mRNA	V	+	541690	545055	YER176W	ECM32	9.00725	7.99575	8.24649	7.72431	7.82359	7.68479	8.25241	9.25272	9.38368	8.83239	7.95525	8.28362	29.3648	1977.56	51.5005	4860.21	1	2.45768
mRNA/SUT	EPL1 / SUT103	ONE	mRNA	VI	-	87847	90345	YFL024C	EPL1	8.75174	8.19155	8.85061	8.57214	9.15752	9.21844	9.78406	10.8898	11.5768	11.2752	10.1467	10.8354	88.3732	1148.8	234.776	868.82	1	0.756285
mRNA/SUT	MET13 / SUT542	BOTH	mRNA	VII	+	272520	274322	YGL125W	MET13	7.53	8.93	11.24	11.01	11.43	10.7	10.52	9.94	9.57	9.28	9.59	8.8	33.8157	1911.95	159.262	4355.72	1	2.27815
mRNA/SUT	YGR027W-A / SUT1505.1	ONE	mRNA	VII	+	536057	537379	YGR027W-A	YGR027W-A	10.339	11.1435	11.2908	11.6026	11.6348	11.5268	11.1581	11.4175	11.0602	10.2168	9.78701	10.3048	3.9923	4173.8	18.608	2913.24	1	0.697982
mRNA/SUT	YGR038C-A / SUT1594.1	ONE	mRNA	VII	-	566145	567467	YGR038C-A	YGR038C-A	11.4802	11.5452	11.6149	12.0069	12.0367	11.8829	11.5566	11.7065	11.3905	10.4464	9.9393	10.6104	12.7907	4323.98	19.6864	3021.53	1	0.698784
mRNA/SUT	ART5 / SUT124	ONE	mRNA	VII	-	625324	627084	YGR068C	ART5	8.68	8.18	8.56	7.41	7.38	6.67	6.86	7.36	5.13	5.87	5.72	5.82	42.4665	125.034	51.7152	1266.12	1	10.1262
mRNA/SUT	MEP1 / SUT128	ONE	mRNA	VII	-	731449	732927	YGR121C	MEP1	10.05	11.39	11.98	11.87	12.3	12.23	11.97	11.35	10.95	10.13	10.69	9.99	123.15	8933.77	392.135	10466.9	1	1.17161
mRNA/SUT	YGR130C / SUT130	ONE	mRNA	VII	-	751394	753844	YGR130C	YGR130C	10.696	11.2911	11.7386	11.6579	11.3542	11.0942	11.1435	10.6766	10.8673	11.4827	11.8511	11.226	124.845	735.941	268.127	1027.84	1	1.39663
mRNA/SUT	YGR161W-A / SUT1522.1	ONE	mRNA	VII	+	811738	813054	YGR161W-A	YGR161W-A	10.02	11.06	11.2	11.29	11.2	10.94	10.58	10.91	10.4	9.02	8.28	9.04	0	703.546	0	383.987	1	0.545788
mRNA/SUT	SNG1 / SUT1627.1	ONE	mRNA	VII	-	892497	894140	YGR197C	SNG1	7.39235	9.46968	9.16886	8.94777	9.45763	9.44172	9.54325	9.58113	8.87813	8.26467	7.93406	7.99979	59.9693	711.636	95.243	230.429	1	0.323802
mRNA/SUT	SNG1 / SUT1627.2	ONE	mRNA	VII	-	892497	894140	YGR197C	SNG1	7.39235	9.46968	9.16886	8.94777	9.45763	9.44172	9.54325	9.58113	8.87813	8.26467	7.93406	7.99979	59.9693	711.636	95.243	230.429	1	0.323802
mRNA/SUT	YGR250C / SUT1631.1	ONE	mRNA	VII	-	991176	993521	YGR250C	YGR250C	11.1019	11.8604	10.9231	10.1056	10.5158	10.4306	10.6342	10.3058	9.00384	7.35069	7.32369	7.14512	297.416	1893.61	109.86	2683.86	1	1.41732
mRNA/SUT	YRF1-3 / SUT1542.1	ONE	mRNA	VII	+	1085031	1090591	YGR296W	YRF1-3	10.8988	10.4435	11.4415	11.5744	11.5046	11.4491	11.1012	10.8882	10.6469	10.4325	10.2141	10.072	123.302	30841.2	131.78	14660.7	1	0.475362
mRNA/SUT	STE20 / SUT150	ONE	mRNA	VIII	-	95118	97937	YHL007C	STE20	10.325	8.99254	8.38892	7.45255	7.65575	6.70223	6.81424	7.05089	7.24608	8.07359	8.25217	7.87369	104.661	355.104	69.1025	531.334	1	1.49628
mRNA/SUT	SOD2 / SUT153	ONE	mRNA	VIII	-	122889	123590	YHR008C	SOD2	11.79	13.2	12.89	12.68	12.73	12.54	12.4	12.51	11.27	11.43	12.4	11.81	132.888	489.045	281.179	2749.45	1	5.62208
mRNA/SUT	SRB2 / SUT156	ONE	mRNA	VIII	-	189131	189749	YHR041C	SRB2	8.42805	8.07393	7.69325	7.54275	7.49848	7.24174	7.07354	6.50695	5.70132	5.94036	6.20595	5.79871	68.9487	4091.26	55.4802	6987.02	1	1.70779
mRNA/SUT	SRB2 / SUT156	ONE	mRNA	VIII	-	189851	189864	YHR041C	SRB2	5.21143	4.68857	4.81714	4.86	4.79143	4.76571	4.17429	3.3	2.24571	3.42	3.70286	4.30286	68.9487	4091.26	55.4802	6987.02	1	1.70779
mRNA/SUT	SMF2 / SUT1654.1	ONE	mRNA	VIII	+	207654	209303	YHR050W	SMF2	9.94976	11.176	10.8271	10.5579	10.3485	9.75036	9.4413	9.4413	10.3585	10.2788	9.98964	9.85006	65.533	437.616	117.833	623.701	1	1.42522
mRNA/SUT	YCK1 / SUT168	ONE	mRNA	VIII	-	372694	374310	YHR135C	YCK1	11.2758	10.9505	10.5258	10.1109	10.1549	9.69846	9.41653	9.55562	9.88288	9.79818	10.4962	9.86534	125.933	2036.82	122.698	2867.34	1	1.40775
mRNA/SUT	YAP1801 / SUT1700.1	ONE	mRNA	VIII	-	420373	422286	YHR161C	YAP1801	10.4754	11.4146	11.6534	11.9548	12.0104	12.1516	11.9395	11.4013	10.611	10.2407	10.3306	9.81194	186.231	671.33	173.56	2723.34	1	4.05663
mRNA/SUT	FLO5 / SUT1668.1	BOTH	mRNA	VIII	+	525392	528619	YHR211W	FLO5	10.1521	9.3168	8.25072	8.34374	8.03145	7.26945	7.53556	7.99768	7.94934	7.43067	7.62178	7.59321	320.865	126984	521.66	236928	1	1.86582
mRNA/SUT	FLO5 / SUT1668.2	BOTH	mRNA	VIII	+	525392	528619	YHR211W	FLO5	10.1521	9.3168	8.25072	8.34374	8.03145	7.26945	7.53556	7.99768	7.94934	7.43067	7.62178	7.59321	320.865	126984	521.66	236928	1	1.86582
mRNA/SUT	FLO5 / SUT1668.3	BOTH	mRNA	VIII	+	525392	528619	YHR211W	FLO5	10.1521	9.3168	8.25072	8.34374	8.03145	7.26945	7.53556	7.99768	7.94934	7.43067	7.62178	7.59321	320.865	126984	521.66	236928	1	1.86582
mRNA/SUT	YHR214W-A / SUT1673.1	ONE	mRNA	VIII	+	543008	543493	YHR214W-A	YHR214W-A	10.5481	10.5115	10.8045	10.658	10.6397	10.5481	10.5481	10.4657	10.42	10.0079	9.4677	9.81564	47.8038	10805	139.209	15286.2	1	1.41473
mRNA/SUT	NCA3 / SUT206	ONE	mRNA	X	-	193860	194873	YJL116C	NCA3	6.68	10.13	9.44	9.51	9.7	8.82	8.53	8.11	5.56	5.18	8.34	7.33	114.626	363.012	174.312	2396.02	1	6.60039
mRNA/SUT	PRY1 / SUT209	BOTH	mRNA	X	-	289875	290774	YJL079C	PRY1	7.63	12.05	12	12.21	12.05	11.54	10.97	9.8	8.72	9.11	9.42	8.7	37.4081	878.005	193.129	9092.07	1	10.3554
mRNA/SUT	REC107 / SUT1859.1	ONE	mRNA	X	-	468555	469183	YJR021C	REC107	7.64865	8.03769	9.07779	9.19633	9.82696	10.033	10.0203	9.93496	8.71046	8.06498	7.92227	8.1014	44.0348	413.935	106.201	2276.16	1	5.49885
mRNA/SUT	YJR028W / SUT1808.2	ONE	mRNA	X	+	478344	479666	YJR028W	YJR028W	10.1716	11.1654	11.3188	11.728	11.7065	11.568	11.2792	11.4631	11.1177	10.2261	9.78163	10.3703	21.945	4182.73	26.173	2917.53	1	0.697519
mRNA/SUT	YJR154W / SUT1824.1	ONE	mRNA	X	+	725784	726824	YJR154W	YJR154W	4.36369	5.21326	5.96628	6.44899	6.69035	6.31383	7.29856	7.86816	7.90677	7.18271	6.43934	7.0572	34.0698	630.355	36.436	813.002	1	1.28975
mRNA/SUT	YJR154W / SUT1824.2	ONE	mRNA	X	+	725784	726824	YJR154W	YJR154W	4.36369	5.21326	5.96628	6.44899	6.69035	6.31383	7.29856	7.86816	7.90677	7.18271	6.43934	7.0572	34.0698	630.355	36.436	813.002	1	1.28975
mRNA/SUT	PTK1 / SUT222	ONE	mRNA	XI	-	68232	70220	YKL198C	PTK1	8.58169	9.69854	10.3451	10.0268	10.0094	9.66638	9.88293	9.80691	9.00135	9.45136	10.3844	9.65106	143.814	12142.4	252.054	13190.8	1	1.08635
mRNA/SUT	YKL187C / SUT223	ONE	mRNA	XI	-	89284	91536	YKL187C	YKL187C	6.99	9.92	9.24	7.21	7.09	6.96	7.23	7.14	9.57	10.97	12.22	11.14	146.47	1316.05	346.307	5401.94	1	4.10468
mRNA/SUT	MTR2 / SUT225	ONE	mRNA	XI	-	92744	93298	YKL186C	MTR2	11.358	10.2021	9.72467	9.4278	9.80409	9.67146	9.60416	10.2736	10.2833	9.73373	9.53751	9.36526	26.2034	57.4789	53.7094	840.738	1	14.6269
mRNA/SUT	PIR1 / SUT227	ONE	mRNA	XI	-	141794	142819	YKL164C	PIR1	11.9196	12.0937	11.8399	11.5046	10.7181	10.299	9.56893	9.12646	8.27863	8.41725	9.71913	8.69633	113.033	797.84	45.8508	2438.86	1	3.05683
mRNA/SUT	PMU1 / SUT232	ONE	mRNA	XI	-	200884	201771	YKL128C	PMU1	7.40507	6.91662	5.79667	5.14196	5.00319	4.43981	4.06543	3.38319	3.22325	3.85584	4.08509	4.22307	73.071	580.514	27.0259	795.641	1	1.37058
mRNA/SUT	GAP1 / SUT1912.1	BOTH	mRNA	XI	+	515063	516871	YKR039W	GAP1	4.8376	6.52472	10.823	10.7346	11.0086	10.5655	9.54191	8.88	8.06875	7.54537	7.78784	7.63821	5.99446	15.1519	267.127	1913.01	1	126.255
mRNA/SUT	GAP1 / SUT1912.2	BOTH	mRNA	XI	+	515063	516871	YKR039W	GAP1	4.8376	6.52472	10.823	10.7346	11.0086	10.5655	9.54191	8.88	8.06875	7.54537	7.78784	7.63821	5.99446	15.1519	267.127	1913.01	1	126.255
mRNA/SUT	GAP1 / SUT1912.3	ONE	mRNA	XI	+	515063	516871	YKR039W	GAP1	4.8376	6.52472	10.823	10.7346	11.0086	10.5655	9.54191	8.88	8.06875	7.54537	7.78784	7.63821	5.99446	15.1519	267.127	1913.01	1	126.255
mRNA/SUT	GAP1 / SUT1912.4	ONE	mRNA	XI	+	515063	516871	YKR039W	GAP1	4.8376	6.52472	10.823	10.7346	11.0086	10.5655	9.54191	8.88	8.06875	7.54537	7.78784	7.63821	5.99446	15.1519	267.127	1913.01	1	126.255
mRNA/SUT	FRE6 / SUT2075.1	ONE	mRNA	XII	-	37333	39471	YLL051C	FRE6	8.85931	9.78609	9.65144	9.59632	10.1084	9.55357	9.99148	10.6818	10.2431	9.10719	8.74241	8.92408	18.9442	1682.31	52.1623	136.841	1	0.0813417
mRNA/SUT	TPO1 / SUT1996.1	ONE	mRNA	XII	+	84804	86564	YLL028W	TPO1	9.5	9.74	8.86	7.91	7.9	6.85	7.62	8.09	8	7.66	7.34	7.36	102.132	139.077	80.5121	713.328	1	5.12904
mRNA/SUT	REX2 / SUT255	ONE	mRNA	XII	-	259738	260547	YLR059C	REX2	9.53235	9.63062	9.88612	8.88375	9.35546	8.83462	9.40459	9.90578	9.03116	8.40222	7.90104	7.99931	45.6031	1858.41	64.5572	1442.75	1	0.776334
mRNA/SUT	YLR072W / SUT2005.1	ONE	mRNA	XII	+	278862	280943	YLR072W	YLR072W	9.25086	9.1315	9.58907	9.26081	9.3006	8.7734	9.42991	11.0712	11.7675	11.3995	10.7827	10.7032	69.7576	1078.63	168.891	5944.61	1	5.51124
mRNA/SUT	IOC2 / SUT260	ONE	mRNA	XII	-	329677	332115	YLR095C	IOC2	8.81159	8.09575	8.26879	8.28544	8.66993	8.74694	8.93957	8.59384	8.29338	8.07116	7.76919	7.48053	99.2744	2173.45	139.651	2499.98	1	1.15023
mRNA/SUT	ICT1 / SUT261	ONE	mRNA	XII	-	339744	340928	YLR099C	ICT1	10.17	10.37	10.18	10.18	10.23	10.03	11.5	12.66	12.63	12.16	11.58	11.58	64.724	5856.02	287.171	9132.92	1	1.55958
mRNA/SUT	APC2 / SUT263	ONE	mRNA	XII	-	395758	398319	YLR127C	APC2	7.59159	7.54778	7.5245	7.48605	7.60265	7.40082	9.14389	11.1162	11.4874	10.7176	9.74255	9.97717	39.6335	222.111	138.652	975.213	1	4.39066
mRNA/SUT	YLR157C-A / SUT2114.1	ONE	mRNA	XII	-	480279	481601	YLR157C-A	YLR157C-A	10.6066	11.1756	11.3094	11.7112	11.7618	11.6535	11.2471	11.4929	11.0906	10.2914	9.79569	10.3619	8.6987	4171.6	16.5897	2981.95	1	0.71482
mRNA/SUT	MAS1 / SUT266	ONE	mRNA	XII	-	491866	493254	YLR163C	MAS1	10.39	10.27	9.32	9.4	9.63	9.69	10	9.81	9.89	9.77	9.71	9.29	111.288	268.021	89.3787	847.185	1	3.1609
mRNA/SUT	YLR179C / SUT2117.1	ONE	mRNA	XII	-	514108	514713	YLR179C	YLR179C	11.13	11.58	8.97	8.33	8.46	7.48	7.49	7.09	6.53	6.34	6.3	6.28	93.4317	421.68	110.632	2922.53	1	6.93067
mRNA/SUT	YLR194C / SUT270	ONE	mRNA	XII	-	540809	541573	YLR194C	YLR194C	12.85	12.61	11.32	10.85	10.69	10.35	10.01	10.34	8.42	8.03	8.74	8.13	157.043	583.139	117.614	1116.09	1	1.91392
mRNA/SUT	THI7 / SUT2017.2	ONE	mRNA	XII	+	612367	614163	YLR237W	THI7	11.78	11.17	10.91	10.18	10.85	10.37	11.19	11.05	9.98	9.61	9.95	9.82	265.272	3488.01	274.877	2142.61	1	0.614281
mRNA/SUT	YLR278C / SUT280	ONE	mRNA	XII	-	699999	704024	YLR278C	YLR278C	10.0196	8.50545	9.24396	9.05885	9.1199	8.30587	8.50142	8.35224	7.17677	6.5841	6.64975	6.4569	173.939	5253.04	193.799	3306.2	1	0.629389
mRNA/SUT	FBP1 / SUT281	ONE	mRNA	XII	-	873746	874792	YLR377C	FBP1	4.09	12.99	10.59	9.74	10.11	10.03	10.2	9.97	9.27	8.68	11.02	10.33	23.2185	132.888	111.64	1013.69	1	7.62812
mRNA/SUT	YML045W-A / SUT2170.1	ONE	mRNA	XIII	+	184461	185783	YML045W-A	YML045W-A	10.315	11.1723	11.3601	11.7833	11.7531	11.6687	11.331	11.5	11.2039	10.2523	9.77457	10.5693	7.53053	4085.55	17.3829	2718.52	1	0.6654
mRNA/SUT	CCS1 / SUT300	ONE	mRNA	XIII	-	347511	348260	YMR038C	CCS1	11.6	10.34	10.6	10.18	10.49	10.34	10.2	9.75	9.76	9.59	9.4	9.1	68.493	1500.15	57.2508	2310.95	1	1.54048
mRNA/SUT	PAH1 / SUT2264.1	ONE	mRNA	XIII	-	590040	592628	YMR165C	PAH1	8.5717	9.42761	9.82689	9.72926	9.4081	8.99555	8.69564	8.01338	6.9194	7.80367	8.28772	7.62703	337.279	2104.84	397.401	4199.34	1	1.99509
mRNA/SUT	PAH1 / SUT2264.2	ONE	mRNA	XIII	-	590040	592628	YMR165C	PAH1	8.5717	9.42761	9.82689	9.72926	9.4081	8.99555	8.69564	8.01338	6.9194	7.80367	8.28772	7.62703	337.279	2104.84	397.401	4199.34	1	1.99509
mRNA/SUT	ADH6 / SUT321	ONE	mRNA	XIII	-	911061	912143	YMR318C	ADH6	11.3331	9.1221	7.971	6.73021	7.34089	6.7439	6.47044	6.33686	5.50886	5.30223	4.95695	5.57435	94.368	2003.11	32.1191	3062.05	1	1.52865
mRNA/SUT	ATG2 / SUT2306.1	ONE	mRNA	XIV	+	191324	196102	YNL242W	ATG2	5.23356	6.16292	7.56195	7.72443	8.19876	7.5508	7.93996	8.93858	9.28448	8.71228	7.37377	7.69096	110.631	1178.66	237.555	508.494	1	0.431417
mRNA/SUT	RAP1 / SUT2310.1	ONE	mRNA	XIV	+	241689	244172	YNL216W	RAP1	10.2766	9.8111	10.065	10.2102	10.6802	10.765	10.7361	10.8994	10.8929	10.3409	10.0008	9.9187	86.9568	1984.31	134.988	803.49	1	0.404923
mRNA/SUT	YNL095C / SUT334	ONE	mRNA	XIV	-	444912	446840	YNL095C	YNL095C	7.77597	7.14629	7.25624	7.18627	7.5261	6.72651	7.83594	10.2447	11.2042	10.6645	9.76494	10.2247	68.8216	2521.28	204.761	1890.53	1	0.749829
mRNA/SUT	YNL054W-A / SUT2333.2	ONE	mRNA	XIV	+	519456	520778	YNL054W-A	YNL054W-A	11.1411	11.4837	11.4933	11.9046	11.9321	11.7685	11.4725	11.6749	11.3119	10.2797	9.79296	10.5024	0.87305	3550.93	13.9193	2556.59	1	0.719977
mRNA/SUT	ARK1 / SUT336	ONE	mRNA	XIV	-	595623	597539	YNL020C	ARK1	9.06515	9.36132	9.39469	8.78785	8.79156	8.15557	7.52044	7.58962	7.62664	8.0589	7.64464	7.18731	76.7129	3066.86	72.5298	2869.07	1	0.935507
mRNA/SUT	ATO2 / SUT338	ONE	mRNA	XIV	-	633008	633856	YNR002C	ATO2	5.35	12.63	12.69	12.18	11.82	11.86	11.81	11.31	10.22	9.24	9.48	9.36	51.3186	442.543	424.596	2398.82	1	5.42053
mRNA/SUT	HOL1 / SUT341	ONE	mRNA	XIV	-	728426	730186	YNR055C	HOL1	10.6189	9.88357	8.48643	7.58292	7.65383	7.0833	7.9241	9.66656	10.7232	10.1612	9.63229	9.67231	109.087	691.25	262.345	1292.57	1	1.8699
mRNA/SUT	YOL098C / SUT2499.1	ONE	mRNA	XV	-	132725	135838	YOL098C	YOL098C	10.6224	9.40997	9.55257	9.41773	9.87191	9.94478	10.3544	9.87215	8.51857	6.68345	6.98123	6.41786	233.124	543.323	209.302	1520.34	1	2.79822
mRNA/SUT	AVO1 / SUT2413.1	ONE	mRNA	XV	+	181682	185212	YOL078W	AVO1	7.97401	7.96413	7.83568	7.76651	7.97401	7.57877	7.84556	7.72698	7.54912	7.26257	6.68947	6.67959	59.8423	190.625	83.4002	695.068	1	3.64626
mRNA/SUT	HTZ1 / SUT358	ONE	mRNA	XV	-	303579	303983	YOL012C	HTZ1	10.32	9.76	9.37	9.56	10.66	10.88	11.24	11.38	11.51	11.36	10.67	10.9	15.3023	312.586	63.2428	851.535	1	2.72416
mRNA/SUT	YOR142W-A / SUT2434.1	ONE	mRNA	XV	+	595112	596434	YOR142W-A	YOR142W-A	10.2598	11.1249	11.3307	11.7855	11.7661	11.6489	11.2595	11.5172	11.1717	10.2626	9.7615	10.4648	5.75925	3848.59	14.5738	2566.66	1	0.666911
mRNA/SUT	YRR1 / SUT373	ONE	mRNA	XV	-	639560	641992	YOR162C	YRR1	6.7493	7.41933	8.12808	8.21321	8.25827	7.93929	8.32358	7.55343	6.33775	6.11456	6.23462	5.78988	62.0181	586.497	114.287	190.036	1	0.324019
mRNA/SUT	PDR10 / SUT2463.1	ONE	mRNA	XV	+	931803	936497	YOR328W	PDR10	6.86	9.05	9.5	9.91	10.27	10.14	10.18	9.79	9.08	9.23	9.84	9.48	76.3843	1158.86	461.041	5591.82	1	4.8253
mRNA/SUT	PDR10 / SUT2464.1	BOTH	mRNA	XV	+	931803	936497	YOR328W	PDR10	6.86	9.05	9.5	9.91	10.27	10.14	10.18	9.79	9.08	9.23	9.84	9.48	76.3843	1158.86	461.041	5591.82	1	4.8253
mRNA/SUT	SCD5 / SUT383	ONE	mRNA	XV	-	936731	939349	YOR329C	SCD5	9.62355	9.98558	10.0198	9.7437	9.80551	9.63499	9.92672	10.1058	9.51472	8.91419	8.92583	8.6443	92.0152	713.409	125.034	2905.6	1	4.07284
mRNA/SUT	CIN1 / SUT2470.1	BOTH	mRNA	XV	+	989789	992833	YOR349W	CIN1	5.63657	6.43034	6.30169	5.70428	6.3549	6.06431	6.43718	6.83124	6.13174	4.98833	4.76867	4.90072	22.8899	990.311	50.0585	1405.05	1	1.4188
mRNA/SUT	CIN1 / SUT799	BOTH	mRNA	XV	+	989789	992833	YOR349W	CIN1	5.63657	6.43034	6.30169	5.70428	6.3549	6.06431	6.43718	6.83124	6.13174	4.98833	4.76867	4.90072	22.8899	990.311	50.0585	1405.05	1	1.4188
mRNA/SUT	ATF1 / SUT2474.1	BOTH	mRNA	XV	+	1046226	1047803	YOR377W	ATF1	8.79	8.14	8.65	8.82	9.33	8.88	9.18	9.87	10.32	9.73	8.95	9.09	5.84258	2104.68	23.9181	2492.06	1	1.18405
mRNA/SUT	FDH1 / SUT2566.2	ONE	mRNA	XV	-	1071793	1072923	YOR388C	FDH1	3.98874	6.81552	10.3347	10.8183	8.74237	8.6673	7.93853	8.74008	9.16302	10.2419	11.5228	10.815	19.5765	132.348	53.6089	844.084	1	6.37776
mRNA/SUT	SAM3 / SUT803	BOTH	mRNA	XVI	+	22938	24701	YPL274W	SAM3	8.61823	7.62568	10.2268	9.84756	9.64436	9.0826	8.89422	8.59515	8.58943	8.21103	8.14382	7.91519	123.429	19947.5	178.206	23604.6	1	1.18334
mRNA/SUT	DIP5 / SUT2577.1	ONE	mRNA	XVI	+	41043	42869	YPL265W	DIP5	8.49	12.08	12.74	12.88	12.95	12.71	12.45	11.64	10.7	8.94	10.25	9.39	37.8636	1579.26	210.305	844.008	1	0.534434
mRNA/SUT	GAL4 / SUT393	ONE	mRNA	XVI	-	79711	82356	YPL248C	GAL4	3.62946	8.22666	7.89571	7.74203	7.58548	6.74407	7.28702	7.93834	7.53591	6.65492	6.4976	6.49156	181.452	1500.86	114.392	1217.23	1	0.811024
mRNA/SUT	GAL4 / SUT394	ONE	mRNA	XVI	-	79711	82356	YPL248C	GAL4	3.62946	8.22666	7.89571	7.74203	7.58548	6.74407	7.28702	7.93834	7.53591	6.65492	6.4976	6.49156	181.452	1500.86	114.392	1217.23	1	0.811024
mRNA/SUT	YPL216W / SUT810	ONE	mRNA	XVI	+	143821	147129	YPL216W	YPL216W	6.96445	5.71561	6.44261	6.3949	6.9225	6.67282	6.85382	6.18517	5.37609	5.15014	5.11069	5.38754	41.5056	1344.29	31.3385	683.508	1	0.508454
mRNA/SUT	YPL162C / SUT397	ONE	mRNA	XVI	-	243206	244027	YPL162C	YPL162C	8.86	8.7	8.29	8.13	7.94	6.99	7.48	9.06	8.99	7.75	7.76	8.43	17.6796	809.436	34.6653	475.01	1	0.586841
mRNA/SUT	RLM1 / SUT406	ONE	mRNA	XVI	-	379120	381150	YPL089C	RLM1	10.6345	10.7499	10.2728	9.88834	9.73931	9.14612	9.62387	10.7052	10.3854	9.6297	9.39032	9.41188	347.269	2173.73	172.747	1050.62	1	0.483324
mRNA/SUT	YPR011C / SUT416	ONE	mRNA	XVI	-	583062	584042	YPR011C	YPR011C	7.73119	8.12991	6.87541	6.45725	7.2644	6.64202	6.94349	7.3811	8.26606	7.40055	6.50587	7.05046	97.0737	567.183	38.3118	583.199	1	1.02824
mRNA/SUT	ASA1 / SUT422	ONE	mRNA	XVI	-	708497	709828	YPR085C	ASA1	8.86	7.46	7.06	7.08	7.31	6.48	6.59	6.2	6.86	7.73	7.46	7.11	22.2576	1282.8	30.1245	927.682	1	0.723172
mRNA/SUT	YPR137C-A / SUT2710.1	ONE	mRNA	XVI	-	808947	810269	YPR137C-A	YPR137C-A	10.5303	11.2159	11.381	11.7656	11.7714	11.7008	11.2877	11.4776	11.1339	10.3164	9.81713	10.4061	10.573	4233.96	23.5182	2931.39	1	0.692351
mRNA/SUT	YPR158W-A / SUT2624.1	ONE	mRNA	XVI	+	844709	846031	YPR158W-A	YPR158W-A	10.3439	11.2181	11.4437	11.856	11.8217	11.7375	11.3806	11.5666	11.2504	10.432	9.87864	10.4482	1.24251	3841.86	14.6092	2642.09	1	0.687711
mRNA/SUT	YPR158C-C / SUT2718.1	ONE	mRNA	XVI	-	854935	856257	YPR158C-C	YPR158C-C	10.4436	11.2356	11.4222	11.7404	11.7259	11.6808	11.3049	11.5959	11.1608	10.2993	9.89118	10.371	16.4673	4114.12	7.60869	2939.82	1	0.714569
mRNA/SUT	YPR195C / SUT429	ONE	mRNA	XVI	-	927965	928294	YPR195C	YPR195C	8.38552	10.06	9.32682	9.00555	8.91627	8.30867	8.11421	8.99288	9.31155	8.78852	7.99091	8.50879	15.6309	3319.7	163.565	6204.7	1	1.86906
mRNA/CUT	ECM32 / CUT571	ONE	mRNA	V	+	541690	545055	YER176W	ECM32	9.00725	7.99575	8.24649	7.72431	7.82359	7.68479	8.25241	9.25272	9.38368	8.83239	7.95525	8.28362	29.3648	1977.56	51.5005	4860.21	1	2.45768
mRNA/CUT	HSF1 / CUT599	ONE	mRNA	VII	+	368753	371254	YGL073W	HSF1	9.06835	9.50729	9.81948	9.79681	10.0721	10.1106	10.4369	10.4849	9.43666	8.77625	8.69668	8.59588	140.197	450.557	106.438	843.626	1	1.87241
mRNA/CUT	SMF2 / CUT643	ONE	mRNA	VIII	+	207654	209303	YHR050W	SMF2	9.94976	11.176	10.8271	10.5579	10.3485	9.75036	9.4413	9.4413	10.3585	10.2788	9.98964	9.85006	65.533	437.616	117.833	623.701	1	1.42522
mRNA/CUT	SAM35 / CUT646	ONE	mRNA	VIII	+	272627	273616	YHR083W	SAM35	9.77042	10.0189	9.12436	8.51806	8.54788	8.29939	7.90182	7.13648	6.92776	8.01115	8.19006	7.44461	134.912	810.267	51.7106	506.466	1	0.625061
mRNA/CUT	STB5 / CUT656	ONE	mRNA	VIII	+	459299	461530	YHR178W	STB5	7.4197	5.98532	6.12578	4.82414	5.31112	4.78573	4.74914	4.46346	4.89772	6.03427	6.09952	5.63979	64.8759	1701.36	37.764	407.913	1	0.239757
mRNA/CUT	GAP1 / CUT722	ONE	mRNA	XI	+	515063	516871	YKR039W	GAP1	4.8376	6.52472	10.823	10.7346	11.0086	10.5655	9.54191	8.88	8.06875	7.54537	7.78784	7.63821	5.99446	15.1519	267.127	1913.01	1	126.255
mRNA/CUT	APC2 / CUT257	ONE	mRNA	XII	-	395758	398319	YLR127C	APC2	7.59159	7.54778	7.5245	7.48605	7.60265	7.40082	9.14389	11.1162	11.4874	10.7176	9.74255	9.97717	39.6335	222.111	138.652	975.213	1	4.39066
mRNA/CUT	APC2 / CUT258	ONE	mRNA	XII	-	395758	398319	YLR127C	APC2	7.59159	7.54778	7.5245	7.48605	7.60265	7.40082	9.14389	11.1162	11.4874	10.7176	9.74255	9.97717	39.6335	222.111	138.652	975.213	1	4.39066
mRNA/CUT	ARG80 / CUT767	ONE	mRNA	XIII	+	352603	353136	YMR042W	ARG80	9.08	9.51	10.9	10.55	10.38	10.28	10.25	10.11	9.95	9.35	9.37	9.18	14.5182	245.66	29.4582	621.29	1	2.52907
mRNA/CUT	CAF120 / CUT802	ONE	mRNA	XIV	+	113271	116453	YNL278W	CAF120	7.16514	7.59155	7.78215	7.70044	7.27236	6.75651	6.52584	8.27209	9.38045	9.49747	8.83699	8.5781	52.1276	192.331	122.721	962.052	1	5.00207
mRNA/CUT	SAM3 / CUT876	ONE	mRNA	XVI	+	22938	24701	YPL274W	SAM3	8.61823	7.62568	10.2268	9.84756	9.64436	9.0826	8.89422	8.59515	8.58943	8.21103	8.14382	7.91519	123.429	19947.5	178.206	23604.6	1	1.18334
mRNA/CUT	CTF19 / CUT904	ONE	mRNA	XVI	+	517651	518760	YPL018W	CTF19	5.85579	6.36779	7.34152	6.7934	7.02589	6.64681	6.21428	6.06604	5.50966	5.57979	5.2434	5.3825	15.1504	379.674	51.8246	3833.64	1	10.0972
UT/UT	CUT445 / SUT013	ONE	CUT	II	-	278428	280876	CUT445	CUT445	3.02339	2.11396	2.21336	2.58924	2.39357	2.93279	2.87922	2.1962	2.08042	3.03591	3.3378	3.25208	25.101	1335.22	36.3687	1045.15	1	0.782752
UT/UT	SUT661 / SUT229	ONE	SUT	XI	-	150899	153083	SUT661	SUT661	3.24844	3.32295	4.35664	4.08433	4.8287	4.23016	4.40798	4.73212	5.36738	5.33317	4.72781	4.92049	35.0307	728.265	45.189	503.055	1	0.690758
UT/UT	SUT747 / SUT328	ONE	SUT	XIV	-	335173	337741	SUT747	SUT747	7.31891	8.61167	8.48184	8.31334	8.48786	8.22821	8.07175	8.9708	9.51954	8.83347	8.29438	8.36728	4.28099	1449.88	51.795	3015.23	1	2.07965
UT/UT	SUT1734.1 / SUT193	ONE	SUT	IX	-	386535	387768	SUT1734.1	SUT1734.1	6.07519	8.50926	7.95062	7.88079	8.52921	8.63895	9.14771	9.46693	8.96814	8.92824	9.75622	9.40707	47.373	1265.39	96.7946	1618.69	1	1.2792
UT/UT	SUT802 / SUT2565.1	ONE	SUT	XV	-	1061113	1064393	SUT802	SUT802	8.40895	6.46819	6.64416	6.92252	7.76065	7.43573	7.78269	8.17482	8.17107	7.86855	7.93155	7.68143	98.3384	6933.75	151.285	24207.8	1	3.49131
UT/UT	SUT802 / SUT2565.2	BOTH	SUT	XV	-	1061113	1064393	SUT802	SUT802	8.40895	6.46819	6.64416	6.92252	7.76065	7.43573	7.78269	8.17482	8.17107	7.86855	7.93155	7.68143	98.3384	6933.75	151.285	24207.8	1	3.49131
mRNA/mRNA	YAL042C-A / ERV46	ONE	mRNA	I	+	61316	62563	YAL042W	ERV46	11.53	11.33	11.27	10.96	10.86	10.41	10.14	9.62	9.03	8.86	9.78	9.23	162.405	962.737	107.318	1661.25	1	1.72555
mRNA/mRNA	YBL012C / SCT1	ONE	mRNA	II	+	203538	205817	YBL011W	SCT1	9.41	8.73	8.52	8.26	9.08	8.97	8.95	8.39	7.49	7.28	7.32	6.93	102.764	731.653	116.181	947.426	1	1.29491
mRNA/mRNA	YDL221W / CDC13	ONE	mRNA	IV	-	62244	65018	YDL220C	CDC13	7.27653	7.21181	7.55271	7.71076	7.92957	7.67823	7.55739	7.05305	5.79063	5.82255	7.07695	6.34564	135.089	661.566	161.475	2659.53	1	4.02006
mRNA/mRNA	TRP1 / YDR008C	BOTH	mRNA	IV	-	462252	462602	YDR008C	YDR008C	4.73838	5.5733	4.82179	4.40151	3.92755	4.06678	3.59658	3.1643	2.85821	3.64652	4.15043	3.53986	23.3703	6578.95	23.6989	5571.31	1	0.846837
mRNA/mRNA	EAF1 / OPI7	ONE	mRNA	IV	+	1194598	1195032	YDR360W	OPI7	5.39	4.64	4.74	4.64	4.61	4.85	5.01	5.25	5.82	5.45	5.16	5.5	11.6852	377.896	31.562	359.695	1	0.951835
mRNA/mRNA	YIL115W-A / NUP159	ONE	mRNA	IX	-	144327	148709	YIL115C	NUP159	9.60685	9.34245	8.76585	8.48999	8.7736	8.43802	8.88753	9.5245	9.80851	9.21003	8.69321	8.40775	175.178	2409.21	229.24	359.623	1	0.14927
mRNA/mRNA	YEL034C-A / HYP2	ONE	mRNA	V	+	85676	86149	YEL034W	HYP2	13.86	13.52	13.59	13.53	13.59	13.6	13.38	12.98	12.4	12.1	12.71	12.16	410.122	353.767	210.757	1376.38	1	3.89064
mRNA/mRNA	YER152C / YER152W-A	BOTH	mRNA	V	+	473485	474051	YER152W-A	YER152W-A	7	7.95	8	8.08	8	8.31	7.85	7.27	5.86	5.49	6.3	5.91	31.2617	610.033	29.5633	1206.96	1	1.97852
mRNA/mRNA	YFL021C-A / GAT1	ONE	mRNA	VI	+	95966	97498	YFL021W	GAT1	7.57556	8.55736	10.5987	10.0006	10.5167	9.92545	9.82372	9.71238	9.41242	9.58874	9.60895	8.9195	130.208	374.377	454.483	7574.1	1	20.2312
mRNA/mRNA	MTO1 / YGL235W	ONE	mRNA	VII	+	55279	55815	YGL235W	YGL235W	5.14935	4.54223	3.32264	2.76644	2.60976	2.41818	2.427	2.11542	1.79624	2.94287	4.34365	3.66231	49.5488	620.37	8.30581	327.962	1	0.528655
mRNA/mRNA	YGL132W / SNT2	ONE	mRNA	VII	-	261648	265859	YGL131C	SNT2	7.39145	7.69662	8.28855	8.17429	8.29208	7.86487	7.99871	7.27871	6.20972	5.69669	6.0055	5.86542	63.5865	364.035	81.2874	627.947	1	1.72496
mRNA/mRNA	HSF1 / YGL072C	BOTH	mRNA	VII	-	371003	371362	YGL072C	YGL072C	5.64908	6.69592	6.36917	6.0385	5.94417	6.01142	5.88583	5.76642	5.4435	5.83067	6.17725	5.79383	42.922	819.492	66.3414	2030.71	1	2.47802
mRNA/mRNA	YRF1-3 / YGR296C-A	BOTH	mRNA	VII	-	1088870	1089445	YGR296C-A	YGR296C-A	9.37245	9.63641	9.16365	9.32241	9.56458	9.54328	9.1241	9.85757	9.81818	9.68533	9.85299	10.0852	8.52365	736.351	8.08676	356	1	0.483464
mRNA/mRNA	YRF1-3 / YGR296C-B	BOTH	mRNA	VII	-	1089746	1090228	YGR296C-B	YGR296C-B	8.86	8.73	8.88	8.85	8.56	8.93	8.55	9.42	9.48	8.96	9.26	9.52	21.3215	545.054	10.8523	112.471	1	0.206348
mRNA/mRNA	YHR069C-A / TRM5	ONE	mRNA	VIII	+	234881	236380	YHR070W	TRM5	9.60939	8.73273	8.17311	7.28273	7.75706	7.00656	7.16075	7.03043	5.4324	6.36683	7.11571	6.47749	146.015	1326.44	75.1904	1190.95	1	0.897851
mRNA/mRNA	ARO9 / YHR137C-A	BOTH	mRNA	VIII	-	375738	376388	YHR137C-A	YHR137C-A	6.16	8.24	7.94	7.99	7.88	8.22	7.95	8.16	7.83	7.21	7.42	7.33	17.8315	40.1946	68.1121	4947.09	1	123.078
mRNA/mRNA	YHR182C-A / GND1	ONE	mRNA	VIII	+	470960	472429	YHR183W	GND1	12.81	10.26	9.48	9.56	9.71	9.29	10.29	11.91	12.2	11.7	11.11	11.29	425.653	330.456	258.849	1323.09	1	4.00382
mRNA/mRNA	RSM7 / YJR114W	ONE	mRNA	X	+	638659	639051	YJR114W	YJR114W	5.46	5.86	4.98	4.8	4.43	4.86	4.73	4.93	5.68	5.9	5.28	6.18	61.2587	345.735	40.8673	479.806	1	1.38779
mRNA/mRNA	YKL053W / ASK1	ONE	mRNA	XI	-	339668	340546	YKL052C	ASK1	8.21759	7.47673	8.21923	8.2024	8.71256	8.73402	8.79952	8.34033	8.0733	7.54548	7.38837	7.21126	43.8829	685.174	99.1218	734.963	1	1.07267
mRNA/mRNA	YLR462W / YLR463C	BOTH	mRNA	XII	-	1066265	1066816	YLR463C	YLR463C	9.15	8.35	8.69	8.03	8.02	8.34	8.3	9.06	8.82	8.12	9.27	8.95	6.62676	2672.8	8.63443	1244.09	1	0.465461
mRNA/mRNA	BSC3 / YRF1-4	ONE	mRNA	XII	+	1067087	1071235	YLR466W	YRF1-4	10.8707	10.4665	11.3961	11.4503	11.4391	11.3786	11.0326	10.8521	10.5805	10.4601	10.1696	10.0931	137.996	22696.3	120.189	8962.49	1	0.394887
mRNA/mRNA	YRF1-4 / YLR466C-A	BOTH	mRNA	XII	-	1070387	1070869	YLR466C-A	YLR466C-A	8.88	8.72	8.93	8.86	8.6	8.97	8.58	9.45	9.52	8.99	9.33	9.57	13.1016	436.834	8.52488	102.826	1	0.23539
mRNA/mRNA	YRF1-5 / YLR467C-A	BOTH	mRNA	XII	-	1077050	1077532	YLR467C-A	YLR467C-A	8.88	8.72	8.93	8.86	8.6	8.97	8.58	9.45	9.52	8.99	9.33	9.57	5.0584	446.295	10.8523	90.4309	1	0.202626
mRNA/mRNA	CAC2 / YML101C-A	BOTH	mRNA	XIII	-	69409	69726	YML101C-A	YML101C-A	6.67934	5.92487	7.12789	7.45412	7.43384	7.95547	7.55421	7.06154	6.54192	6.54579	6.42601	6.50182	9.78825	462.132	37.3169	611.578	1	1.32338
mRNA/mRNA	YMR316C-B / YMR317W	ONE	mRNA	XIII	+	907364	910786	YMR317W	YMR317W	4.4923	4.074	4.07785	3.94583	3.3643	3.63435	2.83755	3.29094	3.42007	3.38823	4.05275	4.27385	1353.69	8093.27	1230.21	2765.67	1	0.341725
mRNA/mRNA	YRF1-6 / YNL339W-A	ONE	mRNA	XIV	+	1517	2092	YNL339W-A	YNL339W-A	9.6079	9.87509	9.38743	9.49009	9.77424	9.70595	9.33394	9.97642	9.90689	9.73554	10.0466	10.1478	5.36215	510.009	5.86884	232.892	1	0.456643
mRNA/mRNA	YNL203C / SPS19	ONE	mRNA	XIV	+	259578	260456	YNL202W	SPS19	4.18	9.68	11.46	10.9	10.77	10.74	11.08	11.77	12.19	11.86	11.04	11.09	13.8858	89.8523	128.138	663.251	1	7.38157
mRNA/mRNA	YOR139C / SFL1	ONE	mRNA	XV	+	586981	589281	YOR140W	SFL1	7.8102	7.84661	8.18852	7.67186	7.78274	7.54337	8.18002	8.84186	8.29196	7.58623	8.19937	7.97638	155.626	826.751	145.196	993.86	1	1.20213
mRNA/mRNA	YOR378W / YOR379C	BOTH	mRNA	XV	-	1050726	1051064	YOR379C	YOR379C	4.22448	3.57847	3.5	3.04661	3.36696	2.77404	3.0233	3.3941	3.61239	4.07758	4.57286	4.42035	11.3566	486.837	2.98919	2195.26	1	4.50923
mRNA/mRNA	YRF1-7 / YPL283W-B	BOTH	mRNA	XVI	+	643	1125	YPL283W-B	YPL283W-B	8.54	8.41	8.53	8.52	8.13	8.57	8.39	9.55	9.62	9.12	9.51	9.54	15.6309	1159.82	13.846	362.101	1	0.312204
mRNA/mRNA	YPR136C / RRP9	ONE	mRNA	XVI	+	802359	804080	YPR137W	RRP9	10.326	8.53014	8.00137	6.96379	6.17562	5.61692	5.83641	6.19557	4.53943	6.00602	6.60462	6.59465	65.3563	499.507	17.1639	3831.43	1	7.67041
mRNA/MUT	ACH1 / MUT58.1	ONE	MUT	II	-	194111	195080	MUT58.1	MUT58.1	4.56111	9.65004	9.00272	9.00272	8.73384	9.28157	8.36536	8.66412	8.65416	7.85746	7.80767	7.80767	181.804	449.517	1562.56	12395.4	1	27.5749
mRNA/MUT	ACH1 / MUT58.2	ONE	MUT	II	-	195087	195664	MUT58.2	MUT58.2	6.20675	11.4999	10.5862	10.616	10.6657	11.1126	10.5962	10.8941	10.5564	9.70239	9.06682	9.48391	56.2004	302.255	638.716	6371.55	1	21.08
mRNA/MUT	FLR1 / MUT125.2	ONE	MUT	II	+	252654	254279	MUT125.2	MUT125.2	4.12492	3.12615	4.11493	4.37461	4.57437	4.41456	4.67424	6.39213	6.68177	6.36216	5.53319	6.23232	43.7311	1848.76	61.6912	841.413	1	0.455123
mRNA/MUT	TOS1 / MUT147.1	ONE	MUT	II	+	563180	563909	MUT147.1	MUT147.1	9.02774	8.39212	8.17363	7.74658	6.96199	6.11781	5.68082	8.3524	9.06747	7.84589	7.0613	6.73356	86.1975	757.109	85.2715	2338.24	1	3.08838
mRNA/MUT	TOS1 / MUT147.2	ONE	MUT	II	+	563972	564949	MUT147.2	MUT147.2	6.13846	5.65096	6.24789	5.69076	5.20326	4.64612	4.79536	7.78002	9.31215	8.4466	7.30247	7.35222	69.9343	750.411	86.8186	1812.92	1	2.4159
mRNA/MUT	IGD1 / MUT550.2	ONE	MUT	VI	+	182276	182677	MUT550.2	MUT550.2	4.80224	9.41045	9.05149	9.41045	9.85672	9.99254	9.98284	9.90522	9.28433	8.4306	7.91642	8.31418	38.8245	98.1766	161.243	1482.52	1	15.1005
mRNA/MUT	ROG3 / MUT521.1	ONE	MUT	VI	-	196752	199017	MUT521.1	MUT521.1	4.44633	4.36675	5.34156	5.45098	5.42114	5.14262	5.84886	6.62473	6.97288	6.65457	6.43574	6.42579	41.6746	2225.24	44.4436	4154.06	1	1.86679
mRNA/MUT	GTS1 / MUT565.1	ONE	MUT	VII	-	157944	159025	MUT565.1	MUT565.1	6.3884	8.32579	7.78928	7.2031	6.7262	6.78581	6.19963	7.01433	8.2165	7.56077	6.94478	7.25277	143.46	107.378	135.225	976.266	1	9.09185
mRNA/MUT	YHR033W / MUT681.1	BOTH	MUT	VIII	-	175420	176029	MUT681.1	MUT681.1	3.41041	7.3052	7.85877	8.47166	8.59028	9.50961	9.55903	9.43052	9.07466	8.72867	7.97739	7.84889	12.7731	221.959	242	3507.09	1	15.8006
mRNA/MUT	YNK1 / MUT914.2	ONE	MUT	XI	-	314850	315315	MUT914.2	MUT914.2	4.43777	5.92124	5.83631	5.90416	5.82504	5.96148	5.68498	5.60951	5.56594	5.90288	5.86893	5.54109	11.7592	97.4843	10.0398	1054.21	1	10.8142
mRNA/MUT	LYP1 / MUT1189.1	BOTH	MUT	XIV	-	139413	139542	MUT1189.1	MUT1189.1	5.09046	6.39015	7.79815	8.15262	8.576	9.39323	9.58031	9.728	9.43262	8.61538	8.95015	8.93046	35.9915	700.356	42.4099	66377.6	1	94.7768
mRNA/MUT	TCB2 / MUT1206.1	BOTH	MUT	XIV	-	462204	463549	MUT1206.1	MUT1206.1	5.5077	3.46227	4.14075	4.48997	4.22057	4.00106	3.81149	3.97113	3.87135	3.582	4.06093	4.01104	35.5866	398.771	18.0756	915.444	1	2.29567
mRNA/MUT	RRP6 / MUT1312.1	ONE	MUT	XV	-	327900	329165	MUT1312.1	MUT1312.1	4.76246	5.05201	5.59115	4.85232	4.423	4.49289	5.01207	6.30003	7.95741	7.42825	6.89908	6.97896	42.795	563.432	46.3985	909.595	1	1.61438
mRNA/MUT	TGL5 / MUT1414.1	ONE	MUT	XV	+	478479	479400	MUT1414.1	MUT1414.1	4.01689	4.37572	5.19305	5.47214	5.4522	5.40236	6.17983	6.52869	7.5653	7.08687	6.14992	6.45892	42.6114	628.903	80.8101	1179.54	1	1.87554
mRNA/MUT	AIM45 / MUT1548.1	ONE	MUT	XVI	+	564069	565142	MUT1548.1	MUT1548.1	4.15835	5.39489	5.1057	4.96609	4.96609	5.44475	4.91623	5.32508	6.02313	4.64698	4.69684	5.05584	177.707	177.599	106.876	783.322	1	4.41062
mRNA/SUT	FLO9 / SUT866.1	ONE	SUT	I	+	23991	25645	SUT866.1	SUT866.1	9.57841	10.0678	9.65831	9.46854	9.07902	8.77938	8.5996	9.59839	9.98792	9.49851	9.30874	9.70825	374.745	170300	600.659	273735	1	1.60736
mRNA/SUT	GDH3 / SUT434	BOTH	SUT	I	-	31484	32748	SUT434	SUT434	6.11406	8.10334	9.76708	9.40132	9.16292	9.05399	8.32582	7.8683	6.96919	6.63066	8.65429	8.01955	128.85	1701.45	145.523	11365	1	6.67963
mRNA/SUT	BDH2 / SUT435	ONE	SUT	I	-	33076	34380	SUT435	SUT435	6.70639	7.5929	7.24587	6.7489	6.57702	6.64382	6.14745	7.05525	7.46175	6.94315	6.69234	6.64513	160.777	531.018	266.402	1639.15	1	3.08682
mRNA/SUT	FLO1 / SUT861.2	ONE	SUT	I	-	207219	208028	SUT861.2	SUT861.2	8.64707	8.61225	8.56315	8.42421	8.05006	7.71456	7.67498	8.88056	9.32652	8.77393	8.44515	8.61598	98.3055	37798	102.535	37243.5	1	0.98533
mRNA/SUT	YAR068W / SUT863.1	BOTH	SUT	I	-	222611	222756	SUT863.1	SUT863.1	9.4774	10.1061	9.43986	8.74548	9.0739	8.51089	8.35137	8.7924	8.69856	8.00418	8.22938	8.91438	50.5344	21348.6	162.237	40873.6	1	1.91458
mRNA/SUT	ICS2 / SUT020	ONE	SUT	II	+	553478	556206	SUT020	SUT020	4.26379	3.8047	4.16396	4.06752	4.22839	4.10686	4.24621	4.10851	5.19064	5.36472	6.06261	5.66008	19.5765	739.745	28.4588	380.225	1	0.513994
mRNA/SUT	PCA1 / SUT453	ONE	SUT	II	-	792818	796570	SUT453	SUT453	3.47737	4.62614	4.99113	4.99667	5.08008	5.493	5.28376	4.74907	3.82477	3.93164	4.23637	4.09945	96.618	8025.53	265.344	12824.5	1	1.59796
mRNA/SUT	YCR061W / SUT458	ONE	SUT	III	-	225274	227890	SUT458	SUT458	5.64864	5.23125	6.24962	6.41477	6.67269	6.78025	6.73565	6.65545	6.37606	6.37984	6.19295	6.30973	151.821	887.385	1258.31	5749.4	1	6.47903
mRNA/SUT	PTC6 / SUT1041.2	BOTH	SUT	III	-	253472	254105	SUT1041.2	SUT1041.2	7.08631	9.01713	9.32566	8.96737	8.90765	9.2958	8.75836	8.67874	7.95219	7.12612	7.20574	7.13607	25.419	629.946	21.7091	646.336	1	1.02602
mRNA/SUT	BRE4 / SUT1209.1	BOTH	SUT	IV	+	39407	39632	SUT1209.1	SUT1209.1	7.77062	8.71221	7.89947	7.90938	7.95894	7.62195	6.9777	7.16602	7.44354	6.1154	6.79929	6.52177	19.5765	366.995	20.7052	2305.41	1	6.28185
mRNA/SUT	BRE4 / SUT1209.2	BOTH	SUT	IV	+	39639	40096	SUT1209.2	SUT1209.2	7.73607	9.17974	7.92524	7.7062	7.90533	7.65642	6.62096	6.97939	7.89537	6.50148	5.70498	6.49153	18.3119	449.748	40.096	3121.34	1	6.94018
mRNA/SUT	BRE4 / SUT1213.1	BOTH	SUT	IV	+	41911	42408	SUT1213.1	SUT1213.1	4.67116	4.42217	4.64129	4.8604	4.23293	4.07357	3.5457	4.36241	4.77076	4.55165	4.25285	4.43213	3.16151	172.351	23.1422	1276.53	1	7.40657
mRNA/SUT	INH1 / SUT460	ONE	SUT	IV	-	134732	135492	SUT460	SUT460	6.75378	7.62883	7.13151	6.86396	6.87796	6.67457	6.50117	6.78442	6.99309	7.13046	6.7528	7.01263	32.3912	1369.46	0	3072.7	1	2.24373
mRNA/SUT	PRM7 / SUT048	ONE	SUT	IV	+	381596	386507	SUT048	SUT048	7.41069	7.89551	6.99573	6.15556	5.98992	6.39513	6.78231	7.07186	5.97517	5.51493	5.10766	5.94502	336.267	1717.88	249.74	13784.6	1	8.02422
mRNA/SUT	BSC1 / SUT048	ONE	SUT	IV	+	381596	386507	SUT048	SUT048	7.41069	7.89551	6.99573	6.15556	5.98992	6.39513	6.78231	7.07186	5.97517	5.51493	5.10766	5.94502	336.267	1717.88	249.74	13784.6	1	8.02422
mRNA/SUT	CHL4 / SUT1161.2	ONE	SUT	IV	-	965444	966333	SUT1161.2	SUT1161.2	5.322	5.2024	7.41492	8.11256	8.57101	8.55108	8.70057	8.0727	6.93654	5.96981	6.77708	6.1791	24.9104	690.705	39.3824	1256.68	1	1.81942
mRNA/SUT	STL1 / SUT498	ONE	SUT	IV	-	1508042	1509826	SUT498	SUT498	4.84217	4.91629	4.11996	3.72368	3.62179	3.82544	4.29122	5.253	5.47095	5.47697	5.37587	5.38355	47.8038	209.3	33.7799	833.966	1	3.98455
mRNA/SUT	YIL166C / SUT175	ONE	SUT	IX	+	30993	32601	SUT175	SUT175	5.85123	5.3958	3.14838	3.13848	2.58405	3.06917	4.33644	7.42542	8.48478	7.64323	6.33636	6.83139	0.789798	1187.49	17.3455	175.598	1	0.147873
mRNA/SUT	QDR2 / SUT606	BOTH	SUT	IX	-	132568	135304	SUT606	SUT606	6.54801	7.65902	5.88921	5.44867	5.70142	5.13896	4.97849	4.8692	4.29378	4.48739	4.67349	4.56758	0	0	0	10996.1	1
mRNA/SUT	QDR1 / SUT606	ONE	SUT	IX	-	132568	135304	SUT606	SUT606	6.54801	7.65902	5.88921	5.44867	5.70142	5.13896	4.97849	4.8692	4.29378	4.48739	4.67349	4.56758	0	0	0	10996.1	1
mRNA/SUT	PDR11 / SUT189	BOTH	SUT	IX	+	328059	331587	SUT189	SUT189	6.53859	5.52889	6.50585	6.42789	6.89904	7.11846	7.14397	6.98987	5.65174	4.53532	4.31678	4.32783	39.4568	682.561	75.0809	589.128	1	0.863114
mRNA/SUT	DAL4 / SUT614	ONE	SUT	IX	-	408336	410216	SUT614	SUT614	2.15661	3.82516	5.25713	5.32634	5.7835	5.02073	4.64598	6.11766	5.64482	4.97127	4.62668	4.9002	44.535	23.0016	78.0533	2369.71	1	103.024
mRNA/SUT	YEL077C / SUT1369.2	BOTH	SUT	V	+	2884	3309	SUT1369.2	SUT1369.2	7.97124	7.83157	8.34038	8.45012	8.08099	8.63967	8.11092	9.11854	9.14847	8.75939	8.72946	8.46009	19.4246	1821.79	23.813	803.109	1	0.440835
mRNA/SUT	GLC3 / SUT504	ONE	SUT	V	-	132677	135397	SUT504	SUT504	3.57383	7.30394	6.72542	7.20338	6.57266	7.47252	6.7822	6.35569	6.25847	6.35379	6.26863	5.96837	975.947	3334.82	712.201	6654.01	1	1.99532
mRNA/SUT	ISC1 / SUT510	ONE	SUT	V	-	192782	194150	SUT510	SUT510	7.58581	8.49208	9.01845	8.4529	8.40469	8.07795	8.05538	8.23438	8.01664	7.50982	7.95107	7.77195	69.302	5759.62	102.102	10104	1	1.75428
mRNA/SUT	YAT2 / SUT512	ONE	SUT	V	-	203350	204590	SUT512	SUT512	6.59718	9.7961	9.53031	9.23605	9.02722	9.89102	9.34047	9.48285	9.19808	7.62235	7.67931	7.80271	44.1159	1885.67	866.875	275.172	1	0.145928
mRNA/SUT	FCY21 / SUT514	ONE	SUT	V	-	273983	278263	SUT514	SUT514	7.25348	7.15866	7.50793	7.98398	8.63672	8.15149	8.06954	7.94526	6.68137	6.19483	6.63756	6.45854	274.626	32710.6	325.686	9220.91	1	0.281894
mRNA/SUT	FCY22 / SUT514	ONE	SUT	V	-	273983	278263	SUT514	SUT514	7.25348	7.15866	7.50793	7.98398	8.63672	8.15149	8.06954	7.94526	6.68137	6.19483	6.63756	6.45854	274.626	32710.6	325.686	9220.91	1	0.281894
mRNA/SUT	AMS1 / SUT541	ONE	SUT	VII	-	210594	213746	SUT541	SUT541	5.75129	7.76414	7.65725	7.827	7.08649	7.5774	7.39649	7.42487	7.03979	5.90261	6.38995	6.65848	137.344	1839.44	726.398	1260.29	1	0.685144
mRNA/SUT	MET13 / SUT542	BOTH	SUT	VII	-	272417	272897	SUT542	SUT542	7.13393	7.87541	6.73915	6.69198	7.31083	7.39116	7.36204	7.48395	6.76863	6.97152	6.86734	6.67721	4.18418	412.979	36.0526	1381.51	1	3.34523
mRNA/SUT	BUD9 / SUT551	ONE	SUT	VII	-	577195	579291	SUT551	SUT551	7.14075	5.17954	6.48761	6.16247	6.60093	6.20109	6.15002	5.18941	4.152	4.36955	4.5121	4.41003	27.5811	6662.49	16.385	1615.15	1	0.242425
mRNA/SUT	AZR1 / SUT569	ONE	SUT	VII	-	942668	944916	SUT569	SUT569	5.60622	3.53324	5.12826	5.40917	5.99143	5.71094	7.1364	8.57037	8.97915	8.40888	7.53039	7.9056	30.1134	413.019	45.5686	571.533	1	1.38379
mRNA/SUT	GND2 / SUT1531.1	ONE	SUT	VII	-	1004454	1005208	SUT1531.1	SUT1531.1	3.29472	6.4806	6.87636	5.73854	5.92653	5.94632	5.32299	5.82759	4.18518	5.00638	6.61911	6.06505	9.78825	94.0443	21.262	565.682	1	6.01505
mRNA/SUT	PCL5 / SUT1658.1	ONE	SUT	VIII	-	236930	237627	SUT1658.1	SUT1658.1	7.64699	8.8717	7.96562	8.3639	7.92579	7.74656	7.8063	8.37385	8.41368	8.11497	7.10931	7.89592	220.97	2783.85	84.9086	707.345	1	0.254089
mRNA/SUT	PTH1 / SUT595	ONE	SUT	VIII	-	483888	484696	SUT595	SUT595	7.8021	6.73933	7.82182	7.21408	6.58753	6.64059	6.36472	5.93774	5.76269	5.79834	6.6301	6.43042	91.2559	3913.86	108.975	9179.68	1	2.34543
mRNA/SUT	FLO5 / SUT1668.1	BOTH	SUT	VIII	-	527599	527840	SUT1668.1	SUT1668.1	10.1877	11.3031	10.8251	10.7852	10.3371	10.2774	9.90888	10.6259	11.1238	10.7753	10.7753	10.9844	25.2673	11357.8	56.0324	19576	1	1.72358
mRNA/SUT	FLO5 / SUT1668.2	BOTH	SUT	VIII	-	527879	528213	SUT1668.2	SUT1668.2	10.0699	10.0898	9.30215	9.06287	8.83355	8.84352	8.50454	9.47164	9.81063	9.2523	8.52448	9.21242	59.1852	13018	46.2889	15975.6	1	1.2272
mRNA/SUT	FLO5 / SUT1668.3	BOTH	SUT	VIII	-	528223	528495	SUT1668.3	SUT1668.3	9.93348	8.81758	7.36293	7.13377	7.01421	6.82491	6.73524	8.28952	8.47883	7.29319	7.0441	7.79136	43.7311	15138.4	28.9015	13859.5	1	0.915519
mRNA/SUT	OPT1 / SUT198	ONE	SUT	X	+	33537	36529	SUT198	SUT198	5.01392	4.17572	4.62472	4.69445	5.39856	5.04924	5.62191	5.94871	6.072	5.87321	5.70836	5.84568	168.399	4191.08	232.362	5569.82	1	1.32897
mRNA/SUT	PRY1 / SUT209	BOTH	SUT	X	+	289653	291069	SUT209	SUT209	7.48461	7.78992	7.74206	7.51707	7.35326	7.00764	6.53406	5.82088	6.45922	7.50456	7.51519	6.80457	37.4068	127.305	50.387	990.098	1	7.7774
mRNA/SUT	MPS3 / SUT634	ONE	SUT	X	-	404065	405145	SUT634	SUT634	5.82808	6.51159	6.17429	6.8437	6.95135	7.6399	7.30107	6.69769	5.89742	5.3872	5.62629	5.73026	72.1349	1986.44	104.219	1075.71	1	0.541528
mRNA/SUT	PGU1 / SUT651	ONE	SUT	X	-	721938	724210	SUT651	SUT651	5.14185	3.85537	4.65619	4.4767	4.91211	4.55482	5.01546	4.81958	4.32832	4.61589	4.59914	4.5776	0.007321	1074.85	12.1776	1029.9	1	0.958182
mRNA/SUT	GAP1 / SUT1912.1	BOTH	SUT	XI	-	515365	515662	SUT1912.1	SUT1912.1	3.35245	5.46836	9.17154	9.4203	9.21805	9.48906	7.41161	6.62174	6.15413	5.1903	4.8301	5.48919	2.04878	12.9799	140.432	1469.63	1	113.224
mRNA/SUT	GAP1 / SUT1912.2	BOTH	SUT	XI	-	515669	515998	SUT1912.2	SUT1912.2	2.45061	3.98724	7.70188	7.84279	7.82121	8.12652	6.33555	5.65245	5.48773	4.51552	4.20306	4.88679	5.36215	12.2051	118.066	1384.96	1	113.474
mRNA/SUT	SUL2 / SUT694	ONE	SUT	XII	-	323484	326260	SUT694	SUT694	5.63908	5.42736	5.80787	4.97868	5.36551	4.8757	5.2596	6.0955	6.57286	6.42607	7.30272	6.41761	70.624	683.686	123.145	1731.28	1	2.53227
mRNA/SUT	VPS34 / SUT2018.1	ONE	SUT	XII	-	618554	620179	SUT2018.1	SUT2018.1	4.52164	5.50982	5.33015	5.35011	4.85103	5.3002	6.09873	7.78561	8.67397	7.42627	6.9272	6.84734	91.559	761.984	104.106	575.442	1	0.75519
mRNA/SUT	VIP1 / SUT2050.2	ONE	SUT	XII	-	939885	940942	SUT2050.2	SUT2050.2	5.38979	6.98677	6.27811	6.46775	6.7073	6.23819	5.55947	4.61127	3.71297	4.26193	5.06042	4.86079	21.4667	463.322	30.6282	437.046	1	0.94329
mRNA/SUT	CYB2 / SUT295	ONE	SUT	XIII	+	165529	168705	SUT295	SUT295	5.64496	6.80331	6.30286	5.38203	5.02285	4.92394	4.33777	3.75874	3.47128	3.65453	4.01304	3.89753	304.226	9186.38	256.37	10742.5	1	1.16939
mRNA/SUT	YML054C-A / SUT295	ONE	SUT	XIII	+	165529	168705	SUT295	SUT295	5.64496	6.80331	6.30286	5.38203	5.02285	4.92394	4.33777	3.75874	3.47128	3.65453	4.01304	3.89753	304.226	9186.38	256.37	10742.5	1	1.16939
mRNA/SUT	SUR7 / SUT719	ONE	SUT	XIII	-	169853	171445	SUT719	SUT719	6.26043	5.69646	6.09387	5.658	5.78242	5.49161	5.48298	5.13874	5.14009	5.66345	5.70485	5.15131	131.472	335.744	87.2748	580.082	1	1.72775
mRNA/SUT	DDR48 / SUT2195.1	ONE	SUT	XIII	-	608925	609894	SUT2195.1	SUT2195.1	7.61214	8.41132	7.73202	8.00174	7.67208	7.752	6.67311	7.29247	7.44232	7.44232	7.4623	7.96178	142.373	4686.98	48.6209	1776.2	1	0.378966
mRNA/SUT	YMR173W-A / SUT2195.1	ONE	SUT	XIII	-	608925	609894	SUT2195.1	SUT2195.1	7.61214	8.41132	7.73202	8.00174	7.67208	7.752	6.67311	7.29247	7.44232	7.44232	7.4623	7.96178	142.373	4686.98	48.6209	1776.2	1	0.378966
mRNA/SUT	ESC1 / SUT2201.1	ONE	SUT	XIII	-	711245	711662	SUT2201.1	SUT2201.1	6.35476	7.70153	6.81366	7.03313	6.95333	6.70392	6.65404	6.47447	5.24742	4.75859	5.5467	5.37711	5.84258	468.033	27.683	405.113	1	0.865565
mRNA/SUT	GTO3 / SUT738	ONE	SUT	XIII	-	772750	773598	SUT738	SUT738	4.66489	7.94943	8.40706	7.70423	7.99682	7.98092	7.55173	6.50722	6.56557	7.36955	7.94062	7.39325	44.3383	30.4717	58.0283	500.825	1	16.4358
mRNA/SUT	PRM1 / SUT743	ONE	SUT	XIV	-	110847	112903	SUT743	SUT743	5.55102	3.71398	4.09451	3.56444	3.59647	3.47898	3.32566	3.45528	4.62301	4.68193	4.5816	4.78997	66.6561	2569.8	50.4006	221.643	1	0.0862493
mRNA/SUT	YGP1 / SUT747	ONE	SUT	XIV	-	335173	337741	SUT747	SUT747	7.31891	8.61167	8.48184	8.31334	8.48786	8.22821	8.07175	8.9708	9.51954	8.83347	8.29438	8.36728	4.28099	1449.88	51.795	3015.23	1	2.07965
mRNA/SUT	MSG5 / SUT749	ONE	SUT	XIV	-	529847	531455	SUT749	SUT749	8.90778	6.57194	6.33461	5.09961	5.52954	5.06513	5.45429	6.22302	6.03479	5.632	4.9824	5.35409	188.393	3449.76	145.06	1512.95	1	0.438567
mRNA/SUT	YNR014W / SUT754	ONE	SUT	XIV	-	652478	653206	SUT754	SUT754	7.23929	5.58667	6.12278	6.56143	7.01451	7.29726	7.71615	8.14695	8.49739	8.37337	7.52041	7.93888	0	1914.4	114.022	1852.67	1	0.967758
mRNA/SUT	PDR18 / SUT760	ONE	SUT	XIV	-	766608	769384	SUT760	SUT760	6.49974	6.51189	6.70439	6.34021	6.40966	6.14399	6.58862	7.44199	7.55379	6.6582	6.32185	6.41583	165.435	3886.34	112.557	7271.8	1	1.87112
mRNA/SUT	ARG1 / SUT768	ONE	SUT	XV	-	219231	220543	SUT768	SUT768	8.24024	9.52602	8.48063	7.67879	7.93947	7.95715	6.99436	6.43545	6.19375	6.01266	6.53895	6.09382	106.596	736.183	352.803	1955.6	1	2.6564
mRNA/SUT	GAS5 / SUT2417.1	ONE	SUT	XV	-	268132	269573	SUT2417.1	SUT2417.1	8.15867	8.77781	8.51817	8.5681	8.73786	8.79778	8.47822	8.45825	7.57947	6.64078	6.97032	7.07018	103.828	1128.03	363.466	2806.32	1	2.48781
mRNA/SUT	SRL1 / SUT2453.1	ONE	SUT	XV	-	797564	798357	SUT2453.1	SUT2453.1	7.41128	6.03476	6.78287	6.56343	6.58338	6.733	7.39134	7.57088	7.8402	7.55093	6.6133	7.13199	73.3996	1752.23	24.3607	441.743	1	0.252103
mRNA/SUT	YOR248W / SUT2453.1	ONE	SUT	XV	-	797564	798357	SUT2453.1	SUT2453.1	7.41128	6.03476	6.78287	6.56343	6.58338	6.733	7.39134	7.57088	7.8402	7.55093	6.6133	7.13199	73.3996	1752.23	24.3607	441.743	1	0.252103
mRNA/SUT	FAA1 / SUT2460.1	ONE	SUT	XV	-	909505	911610	SUT2460.1	SUT2460.1	8.22826	8.77748	9.05708	8.90729	9.10701	9.15694	8.80744	9.07705	8.63768	6.74038	6.36093	6.70044	456.672	14649.1	804.286	17282.6	1	1.17977
mRNA/SUT	PDR10 / SUT2464.1	BOTH	SUT	XV	-	935977	936362	SUT2464.1	SUT2464.1	2.85762	6.80668	5.22904	5.62593	5.58624	7.68977	6.23119	4.31619	5.07028	4.91153	5.12982	4.69324	11.3566	167.907	38.9825	729.087	1	4.3422
mRNA/SUT	REV1 / SUT797	ONE	SUT	XV	-	982522	984802	SUT797	SUT797	3.43143	6.36331	5.77766	5.49148	4.52385	3.86492	3.56509	3.02285	3.87949	4.96164	5.2653	4.63989	30.933	1854.46	32.3379	1220.42	1	0.658101
mRNA/SUT	CIN1 / SUT2470.1	BOTH	SUT	XV	-	990097	991202	SUT2470.1	SUT2470.1	4.12877	3.40075	3.37083	3.83956	4.05896	4.72714	5.69451	7.92844	8.94567	8.04811	6.56215	7.76887	368.799	939.792	152.915	1190.11	1	1.26635
mRNA/SUT	CIN1 / SUT799	BOTH	SUT	XV	-	991746	992746	SUT799	SUT799	6.77	5.81	7.2	8.62	9.34	9.91	9.81	8.73	8.55	6.99	6.2	5.28	18.9442	2111.53	62.2433	2529.26	1	1.19784
mRNA/SUT	ATF1 / SUT2474.1	BOTH	SUT	XV	-	1046720	1047881	SUT2474.1	SUT2474.1	5.4506	5.70017	4.57212	4.76179	4.63201	4.74182	4.31256	4.39243	6.00964	5.25095	4.76179	5.06127	14.8467	5230.58	58.4738	4813.7	1	0.920299
mRNA/SUT	FRE5 / SUT802	ONE	SUT	XV	-	1061113	1064393	SUT802	SUT802	8.40895	6.46819	6.64416	6.92252	7.76065	7.43573	7.78269	8.17482	8.17107	7.86855	7.93155	7.68143	98.3384	6933.75	151.285	24207.8	1	3.49131
mRNA/SUT	SAM3 / SUT803	BOTH	SUT	XVI	-	23909	24701	SUT803	SUT803	6.6	6.24	7.33	7.03	7.19	6.79	7.14	9.17	9.75	9.27	8.36	8.72	163.342	1958.17	179.99	4060.86	1	2.0738
mRNA/SUT	FAS2 / SUT806	ONE	SUT	XVI	-	108949	109101	SUT806	SUT806	3.89294	4.5098	3.88608	4.28176	4.14824	3.90294	3.93098	3.50451	3.09353	3.83412	4.08843	4.34039	50.9901	569.003	91.5875	593.606	1	1.04324
mRNA/SUT	GPH1 / SUT843	ONE	SUT	XVI	-	863443	864227	SUT843	SUT843	4.45306	8.53465	7.62525	7.88558	7.18991	7.52262	6.65055	6.40387	5.47934	6.07764	5.94076	5.6561	95.8337	386.923	65.6797	1044.67	1	2.69996
mRNA/CUT	GAL1 / CUT445	ONE	CUT	II	-	278428	280876	CUT445	CUT445	3.02339	2.11396	2.21336	2.58924	2.39357	2.93279	2.87922	2.1962	2.08042	3.03591	3.3378	3.25208	25.101	1335.22	36.3687	1045.15	1	0.782752
mRNA/CUT	THO1 / CUT557	ONE	CUT	V	-	281567	282447	CUT557	CUT557	5.76161	5.87832	5.46148	5.14625	4.92171	5.34091	4.75759	4.47489	5.16841	5.11287	5.50473	5.33072	60.2979	929.854	40.0915	410.391	1	0.44135
mRNA/CUT	PHO84 / CUT281	ONE	CUT	XIII	+	23944	26104	CUT281	CUT281	8.29864	7.8983	7.24496	7.04242	7.31515	7.58632	6.69377	6.91387	6.51147	5.60972	6.38037	6.09301	85.7964	858.512	563.83	4094.11	1	4.76884
mRNA/CUT	GTO3 / CUT790	ONE	CUT	XIII	-	773598	774054	CUT790	CUT790	4.04779	7.88486	6.86193	6.44932	6.18092	5.51352	4.45457	3.80884	7.13462	8.60985	9.16691	8.80039	37.7119	31.569	62.5675	790.05	1	25.0262
UT/UT	SUT655 / SUT218	ONE	SUT	XI	+	18569	19681	SUT218	SUT218	5.84547	6.81162	6.76229	6.30655	6.36558	4.97911	4.43022	2.99547	3.49326	4.19822	4.42908	4.15011	21.1429	293.628	8.3821	1078.01	1	3.67134
UT/UT	SUT657 / SUT220	ONE	SUT	XI	+	21233	22073	SUT220	SUT220	5.4043	11.9609	11.6354	11.3471	11.5963	11.8468	11.8184	11.3009	10.5576	9.42698	10.4461	9.76885	11.8372	410.001	173.099	1422.29	1	3.46898
UT/UT	SUT802 / SUT2565.2	BOTH	SUT	XV	+	1064068	1064677	SUT2565.2	SUT2565.2	2.75095	5.19292	5.57167	5.5019	5.98033	4.84407	5.19292	7.02689	7.14649	6.688	6.31921	5.71121	4.57798	109.799	6.53511	469.057	1	4.27196
										Color scale for tiling array data												Color scale for dsRNA counts
										12	high											white is low and green (80th percentile) is high
										8	medium
										2	low
